# Supplementary material
Source: PubMed Central journal article supplement (PMC6399609)
Supplement: EMBR-20-e46613-s001.pdf [file EMBR-20-e46613-s001.pdf]

## Table of Contents

### **Appendix Figure S1.**

Confocal microscopical analysis and quantitative analysis for colocalization of *M.tb* (GFP) with Lamp1 in Lamp1-mCherry-expressing BMMs pretreated with EVs in the presence of IFN- $\gamma$ .

Page 2

### **Appendix Figure S2.**

Confocal microscopical analysis and quantitative analysis for colocalization of *M.tb* (GFP) with Lamp1 in wild-type BMMs pretreated with EVs plus liposomal RNA from WT *M.tb* cells in the presence of IFN- $\gamma$ .

Page 3

### **Appendix Figure S3.**

Immunofluorescence microscopy analysis for *M.tb* colocalization with Ub and LC3 in BMMs pretreated with EVs in the presence of IFN- $\gamma$ .

Page 4

### **Appendix Figure S4.**

Immunofluorescence microscopy analysis for *M.tb* colocalization with Ub and LC3 in *M.tb*-infected BMMs treated with EVs in the presence of IFN- $\gamma$ .

Page 5

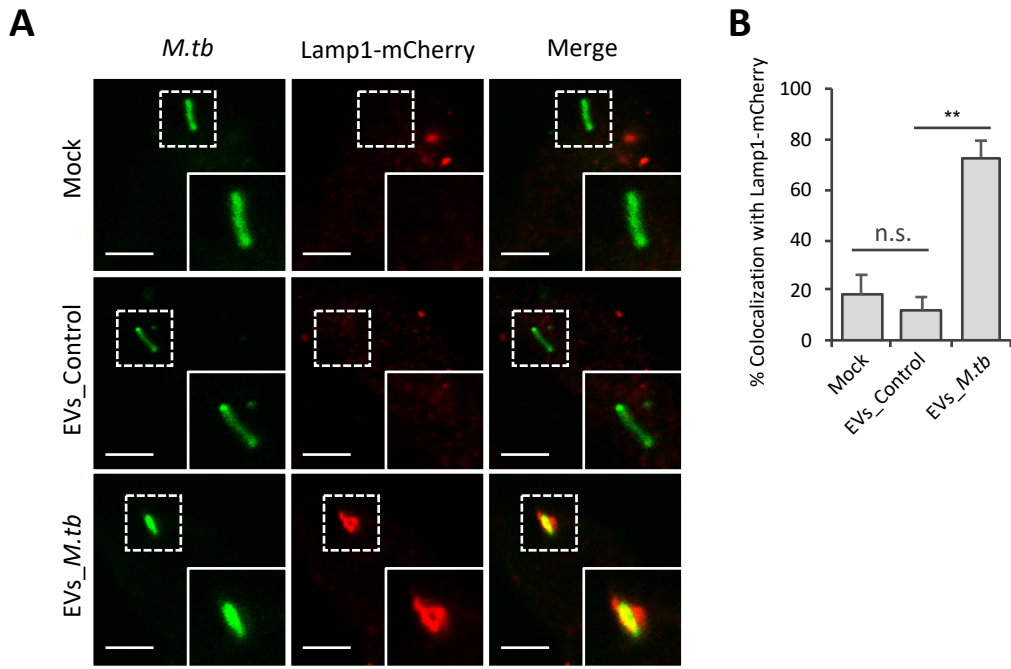

**Appendix Figure S1. Confocal microscopical analysis (A) and quantitative analysis (B) for colocalization of *M.tb* (GFP) with Lamp1 in Lamp1-mCherry-expressing BMMs pretreated with EVs in the presence of IFN- $\gamma$ .** Data shown in (B) are the mean  $\pm$  SD of triple independent infections and all data shown are representative of at least three independent experiments. Scale bar, 5  $\mu$ M. n.s., not significant; \*\*  $p < 0.01$  by two-tailed Student's t-test.

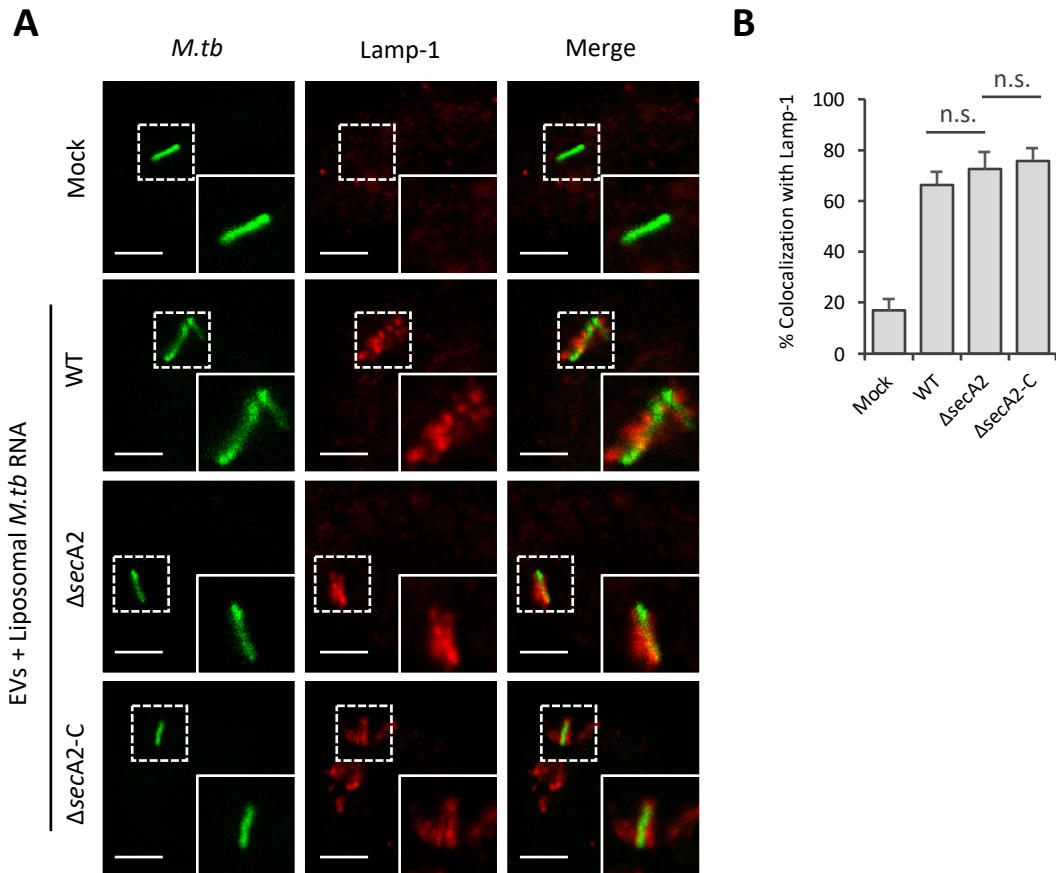

**Appendix Figure S2. Confocal microscopical analysis (A) and quantitative analysis (B) for colocalization of *M.tb* (GFP) with Lamp1 in wild-type BMMs pretreated with EVs plus liposomal RNA from WT *M.tb* cells in the presence of IFN- $\gamma$ .** Data shown in (B) are the mean  $\pm$  SD of triple independent infections and all data shown are representative of at least three independent experiments. Scale bar, 5  $\mu$ M. Mock, untreated. n.s., not significant by two-tailed Student's t-test.

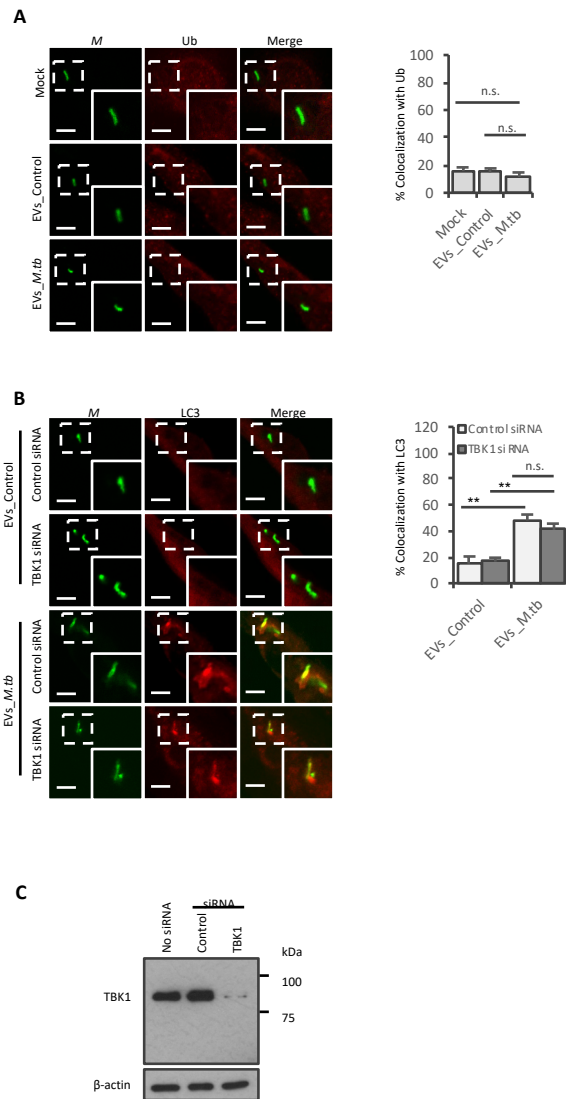

**Appendix Figure S3. Immunofluorescence microscopy analysis for *M.tb* colocalization with Ub and LC3 in BMMs pretreated with EVs in the presence of IFN- $\gamma$ .** (A) Representative photos from immunofluorescence microscopy analysis for *M.tb* colocalization with Ub BMMs. Cells were pretreated with EVs from *M.tb*-infected (EVs\_ *M.tb*) or uninfected (EVs\_Control) BMMs in the presence of IFN- $\gamma$  for 5 hr and then infected with GFP-expressing *M.tb* for 24 hr. Mock, no EVs treatment. (B) Similar to (A), but *M.tb* colocalization with LC3. (C) Western Blot to determine siRNA knockdown efficiency in BMMs. BMMs were treated with control siRNA or mouse TBK1-specific siRNA before EVs and IFN- $\gamma$  treatment. . Scale bar, 5  $\mu$ m. n.s., not significant; \*\*  $p < 0.01$  by Student's t-test (two tailed).

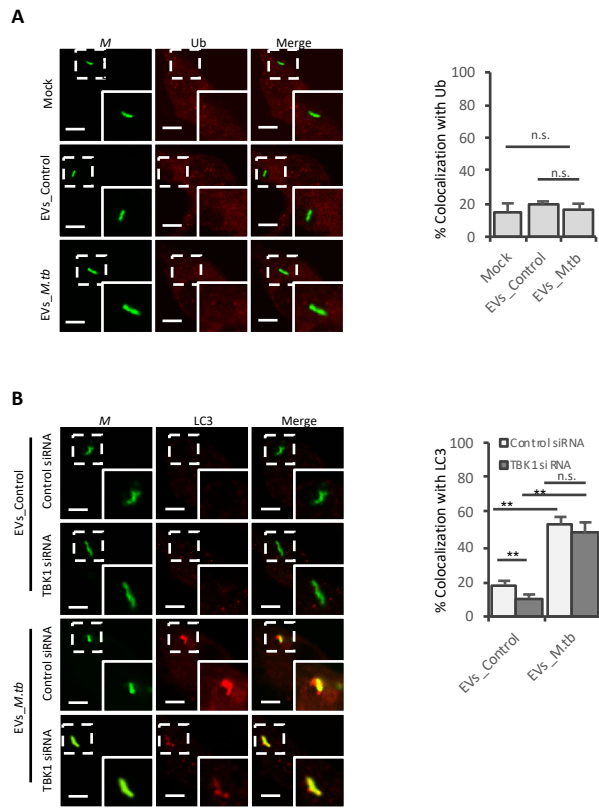

**Appendix Figure S4. Immunofluorescence microscopy analysis for *M.tb* colocalization with Ub and LC3 in *M.tb*-infected BMMs treated with EVs in the presence of IFN- $\gamma$ .** (A) Representative photos from immunofluorescence microscopy analysis for *M.tb* colocalization with Ub BMMs. Cells were infected with GFP-expressing *M.tb* for 24 hr and then treated with EVs from *M.tb*-infected (EVs\_*M.tb*) or uninfected (EVs\_Control) BMMs for 24 hr. Mock, no EVs treatment. (B) Similar to (A), but *M.tb* colocalization with LC3. BMMs were pre-treated with control siRNA or mouse TBK1-specific siRNA before *M.tb* infection. . Scale bar, 5  $\mu$ M. n.s., not significant; \*\*  $p < 0.01$  by Student's t-test (two tailed).
