# Supplementary material
Source: PubMed Central journal article supplement (PMC6399609)
Supplement: EMBR-20-e46613-s002.pdf [file EMBR-20-e46613-s002.pdf]

## Expanded View Figures

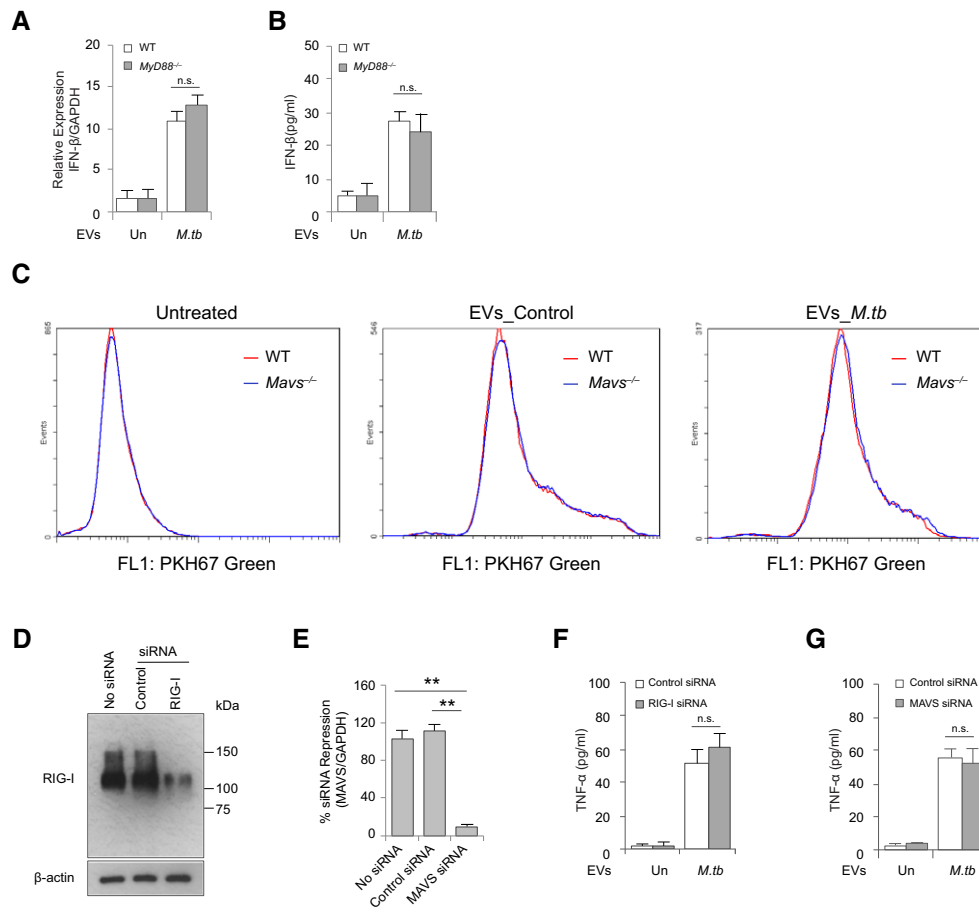

**Figure EV1. Evaluating the role of MyD88, MAVS and Rig-1 in EV-induced cytokine production and EV uptake.**

A Quantitative real-time PCR for IFN- $\beta$  expression in WT and *MyD88*<sup>-/-</sup> BMMs at 5 h after treatment with EVs isolated from uninfected (Un) or *M.tb*-infected (*M.tb*) macrophages.

B Similar to (A), but IFN- $\beta$  protein in BMM culture supernatant was measured using ELISA at 24 h.

C EV uptake assay. WT and *Mavs*<sup>-/-</sup> BMMs were treated with PKH67 green-labeled EVs for 4 h, and then, EV uptake rate was determined by flow cytometry.

D, E Western blot (D) and quantitative real-time PCR (E) to determine siRNA knockdown efficiency for RIG-I (D) and MAVS (E), respectively, in BMMs.

F, G ELISA analysis for TNF- $\alpha$  in the culture supernatant of BMMs pre-treated with control, RIG-I (F), or MAVS (G) siRNA, followed by EV treatment for 24 h.

Data information: Data shown in (A, B, and E–G) are the mean  $\pm$  SD of three wells, and all results shown are representative of three independent experiments. n.s., not significant; \*\**P* < 0.01 by Student's *t*-test (two-tailed).

Source data are available online for this figure.

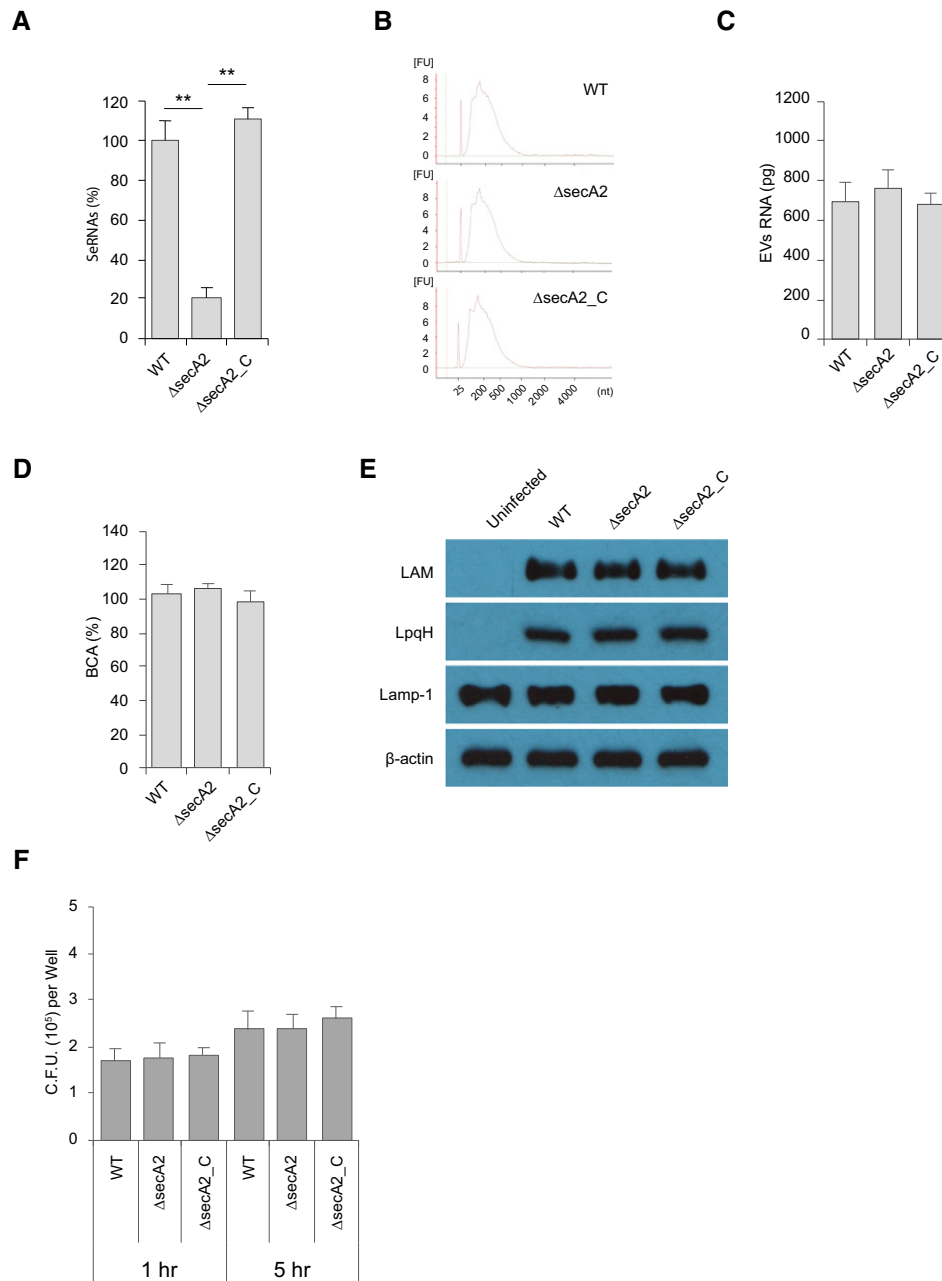

**Figure EV2. Analyzing the affect of SecA2-deletion on mycobacterial and host RNA/protein/glycolipid transport to EVs.**

- A Released *M.tb* RNA in the culture supernatant from the same number of mycobacteria.  
 B RNA bioanalyzer analysis for total RNA isolated from EVs released by WT,  $\Delta$ secA2, or secA2-complemented ( $\Delta$ secA2\_C) *M.tb* strains.  
 C Quantification of EV total RNA analyzed in (B).  
 D Quantification of total proteins of EVs from various *M.tb* strain-infected BMMs.  
 E Western blot analysis for host and *M.tb* proteins in EVs.  
 F *M.tb* survival assay in wild-type mouse BMMs.

Data information: Data shown in (A, C, D and F) are the mean  $\pm$  SD of three independent cultures (A) or infections (C, D and F), and all results shown are representative of three independent experiments.  $**P < 0.01$  by Student's *t*-test (two-tailed). Source data are available online for this figure.

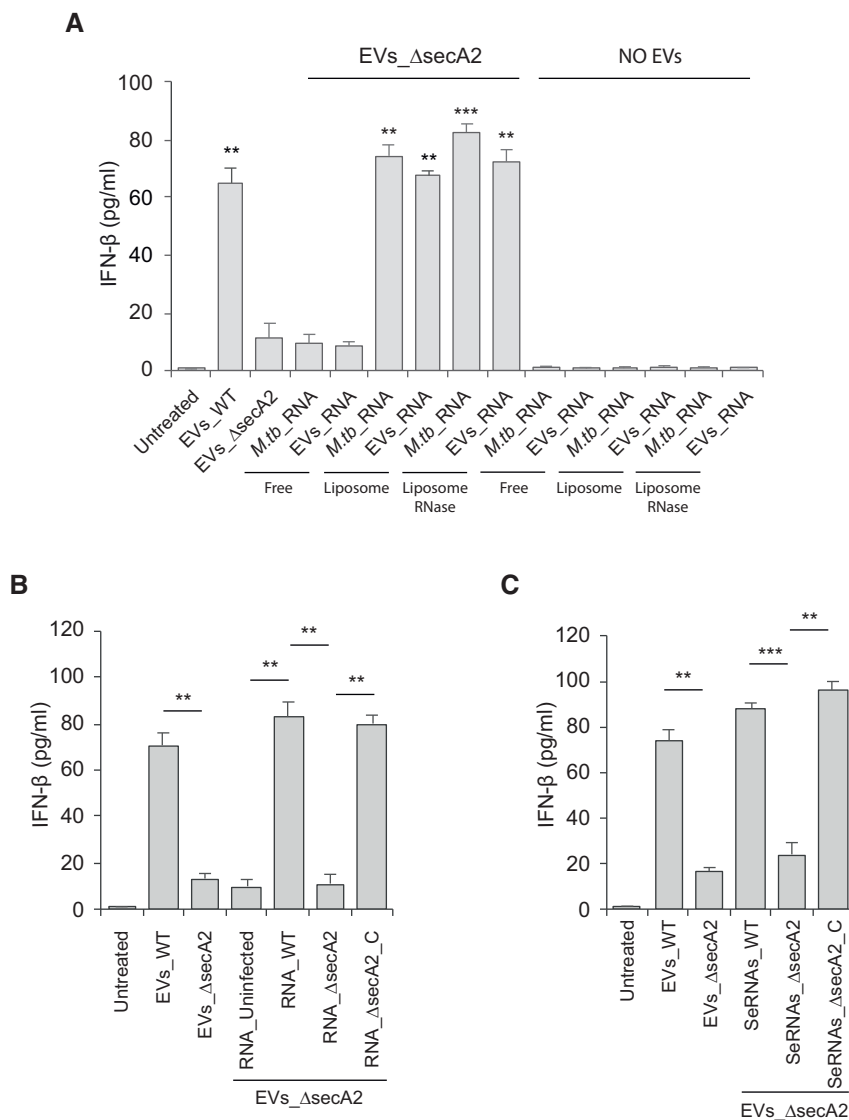

**Figure EV3. EV-induced IFN-β production by BMMs requires the mycobacterial RNA to be lipid encapsulated.**

**A** ELISA analysis for IFN-β secreted by BMMs treated with EVs from ΔsecA2-infected macrophages in combination with free or liposomal (with or without RNase treatment) *M.tb* RNA or RNA from EVs released by WT *M.tb*-infected macrophages. EVs\_WT and EVs\_ΔsecA2, EVs from WT or ΔsecA2 *M.tb*-infected macrophages, respectively; M.tb\_RNA, RNA from *M.tb* cells; EVs\_RNA, RNA from EVs released by WT *M.tb*-infected macrophages. \*\**P* < 0.01 and \*\*\**P* < 0.001, compared to EVs\_ΔsecA2, by two-tailed Student's *t*-test.

**B** Similar to (A), but BMMs were co-treated with EVs\_ΔsecA2 and liposomal RNA from EVs released by uninfected (RNA\_Uninfected), WT (RNA\_WT), ΔsecA2 (RNA\_ΔsecA2), or secA2-complemented (RNA\_ΔsecA2\_C) *M.tb* strains.

**C** Similar to (B), but BMMs were co-treated with EVs\_ΔsecA2 and liposomal RNA released (SeRNAs) by WT (SeRNAs\_WT), ΔsecA2 (SeRNAs\_ΔsecA2), or secA2-complemented (SeRNAs\_ΔsecA2\_C) *M.tb* strains.

Data information: In all tests, IFN-β production was measured 24 h post-treatment. Data shown are the mean ± SD of three independent treatments, and all results shown are representative of three independent experiments. n.s., not significant; \*\**P* < 0.01 and \*\*\**P* < 0.001 by Student's *t*-test (two-tailed).

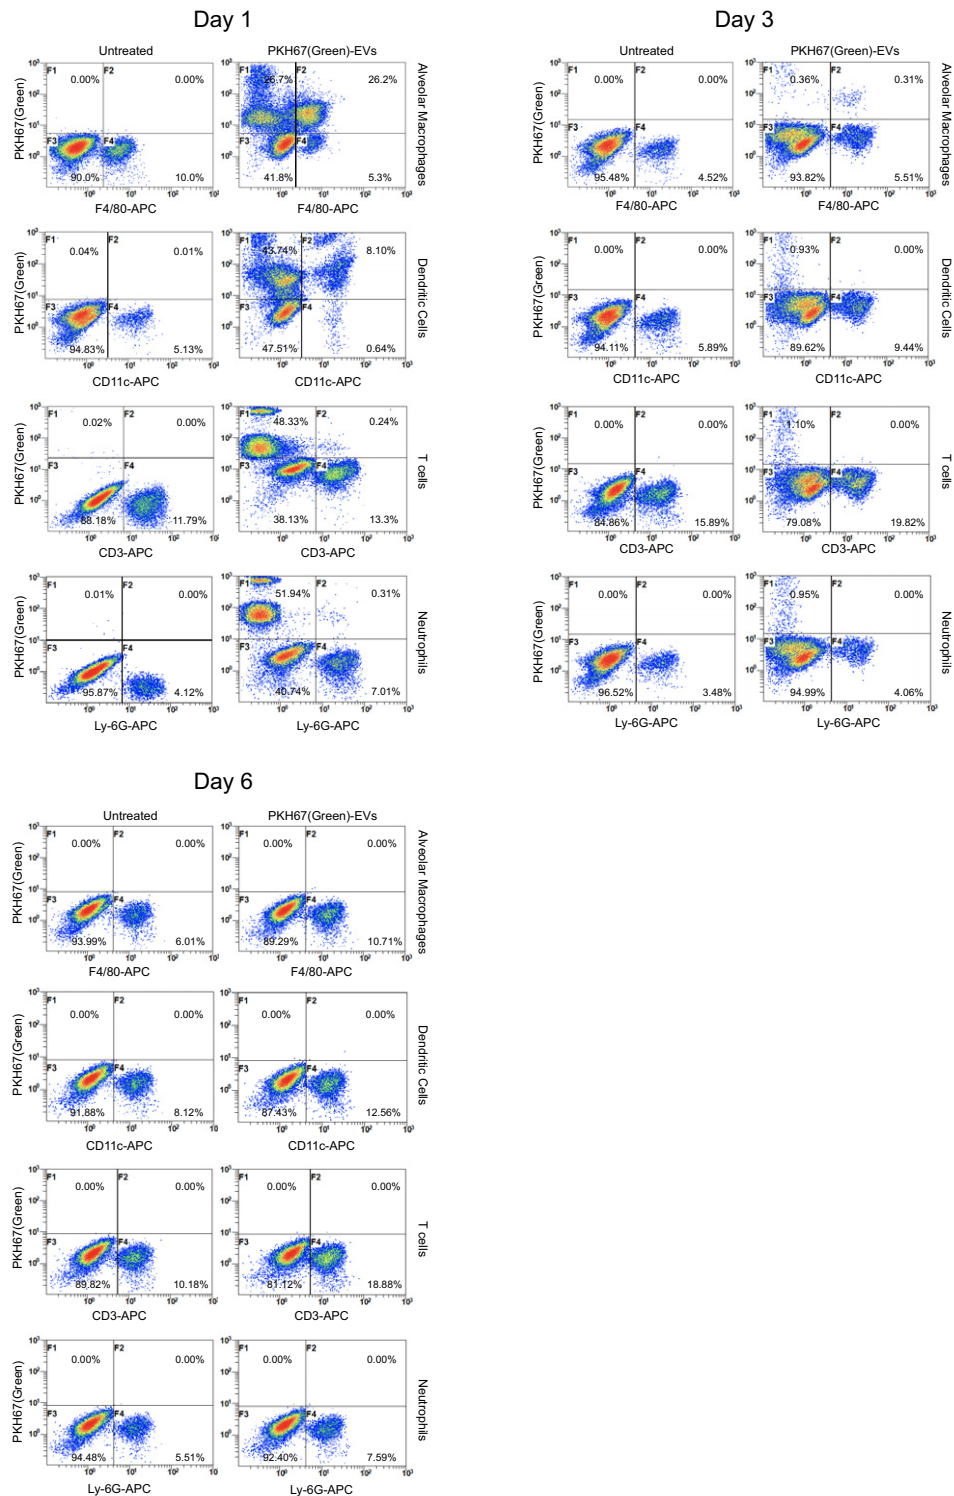

**Figure EV4. EV uptake assay.**

Wild-type C57BL/6 mice ( $n = 3$  per group) were aerosol-infected with WT *M.tb* at a dose of 100–150 CFU/lung. Three weeks post-infection, PKH67 green-labeled EVs isolated from WT *M.tb*-infected macrophages were intratracheally injected into mice and the distribution of labeled EVs in different cell types of bronchoalveolar lavage (BAL) was determined by flow cytometry. Alveolar macrophages, APC-F4/80; DCs, APC-CD11c; T cells, APC-CD3; neutrophils, APC-Ly-6G. Data shown are representative of two independent experiments.
