# Supplementary material
Source: PubMed Central journal article supplement (PMC6399609)
Supplement: EMBR-20-e46613-s005.pdf [file EMBR-20-e46613-s005.pdf]

**Full title:** The lysine-specific methyltransferase KMT2C/MLL3 regulates DNA repair components in cancer

**Short title:** KMT2C/MLL3 and DNA repair

Theodoros Rampias<sup>1</sup>, Dimitris Karagiannis<sup>1</sup>, Margaritis Avgeris<sup>2</sup>, Alexander Polyzos<sup>1</sup>, Antonis Kokkalis<sup>1</sup>, Zoi Kanaki<sup>1</sup>, Evgenia Kousidou<sup>1</sup>, Maria Tzetis<sup>3</sup>, Emmanouil Kanavakis<sup>3,4</sup>, Konstantinos Stravodimos<sup>5</sup>, Kalliopi N. Manola<sup>6</sup>, Gabriel E. Pantelias<sup>6</sup>, Andreas Scorilas<sup>2</sup>, and Apostolos Klinakis<sup>1,\*</sup>

<sup>1</sup>Biomedical Research Foundation Academy of Athens, 4, Soranou Efesiou Str., Athens 11527, Greece

<sup>2</sup>Department of Biochemistry and Molecular Biology, Faculty of Biology, National and Kapodistrian University of Athens, Athens, Greece

<sup>3</sup>Department of Medical Genetics, Medical School, National and Kapodistrian University of Athens, “Aghia Sophia” Children’s Hospital, Athens, Greece

<sup>4</sup>University Research Institute for the Study and Treatment of Childhood Genetic and Malignant Diseases, National and Kapodistrian University of Athens, “Aghia Sophia” Children’s Hospital, Athens, Greece

<sup>5</sup>First Department of Urology, “Laiko” General Hospital, Medical School, National and Kapodistrian University of Athens, , Greece

<sup>6</sup>Laboratory of Health Physics, Radiobiology & Cytogenetics, National Center for Scientific Research (NCSR) “Demokritos”, Athens, Greece

\* Corresponding author

Corresponding author’s information

Biomedical Research Foundation Academy of Athens, 4, Soranou Efesiou Str., Athens 11527, Greece

Correspondence and requests for materials should be addressed to [aklinakis@bioacademy.gr](mailto:aklinakis@bioacademy.gr)

Keywords: KMT2C, epigenetic regulation, DNA repair, PARPi sensitivity

## ABSTRACT

Genome-wide studies in tumor cells have indicated that chromatin-modifying proteins are commonly mutated in human cancers. The lysine-specific methyltransferase 2C (KMT2C/MLL3) is a putative tumor suppressor in several epithelia and in myeloid cells. Here we show that downregulation of KMT2C in bladder cancer cells leads to extensive changes in the epigenetic status and the expression of DNA damage response and DNA repair genes. More specifically, cells with low KMT2C activity are deficient in homologous recombination-mediated double strand break DNA repair. Consequently, these cells suffer from substantially higher endogenous DNA damage and genomic instability. Finally, these cells seem to rely heavily on PARP1/2 for DNA repair, and treatment with the PARP1/2 inhibitor Olaparib leads to synthetic lethality, suggesting that cancer cells with low KMT2C expression are attractive targets for therapies with PARP1/2 inhibitors.

## INTRODUCTION

It is well established that epigenetic dysregulation is an integral component of cancer etiology and progression [1]. Therefore, it's not surprising that numerous epigenetic modifiers, such as DNMT3A, EZH2 and the MLL proteins, are frequently found genetically altered in cancer [2, 3]. Lysine (K)-Specific Methyltransferase 2C (KMT2C, also known as MLL3) belongs to the mixed-lineage leukemia (MLL) family of histone methyltransferases which methylate the histone 3 tail at lysine 4 (H3K4) [4] as part of the Complex Proteins Associated with Set1 (COMPASS) complex [5]. Although originally identified as oncogenic fusions in leukemia [6], recent genome-wide mutation studies have revealed frequent, presumably loss-of-function, mutations in various members of the MLL family, including MLL2/KMT2D, MLL3/KMT2C and MLL4/KMT2B in a variety of malignancies, particularly solid tumors [7-11]. Mouse studies have also uncovered a tumor suppressor role for KMT2C in acute myeloid leukemia (AML) [12] and urothelial tumorigenesis [13]. Mechanistic studies of KMT2C in normal cells have focused primarily on its role in enhancer regulation [14, 15] by deposition of H3K4me1 marks. Interestingly, recent reports also indicate roles for KMT2C in transcription regulation, which are independent of its H3K4 monomethylation activity on enhancers [16, 17]. However, its role in tumorigenesis remains largely undefined.

Bladder cancer is the fifth most common human malignancy and the second most frequently diagnosed genitourinary tumor after prostate cancer [18]. The majority of malignant tumors arising in the urinary bladder are urothelial carcinomas. Superficial carcinoma accounts for approximately 75% of the newly diagnosed cases while the remaining 25% represents muscle-invasive bladder cancer [19]. The latter, often originating from superficial carcinoma, is a life threatening disease with high metastatic potential. Recent genome-wide studies on superficial and muscle-invasive urothelial carcinoma have indicated that epigenetic regulators, including *KMT2C* are commonly mutated in both types [11, 20]. Here we show that *KMT2C* is downregulated in neoplastic tissue in several epithelial cancers. As expected, *KMT2C* knockdown leads to epigenetic and expression changes. Of interest, genes involved in DNA damage response (DDR) and DNA repair, particularly homologous recombination (HR)-mediated DNA repair, are downregulated. This leads to increased DNA damage and chromosomal instability, highlighted by generation of micronuclei and numerical/regional chromosome losses. In our experiments, cells with reduced *KMT2C* expression are highly dependent on the alternative end joining (alt-EJ) pathway for repair of double strand breaks (DSBs), while inhibition of PARP1/2 causes synthetic lethality.

## RESULTS

### ***KMT2C* is downregulated in human epithelial cancers**

Mutational data from published studies show that the majority of *KMT2C* mutations cluster within the plant homeodomains (PHD) 1-3 located in the N-terminus of the protein (Catalogue of Somatic Mutations in Cancer-COSMIC). *KMT2C* PHD domains act as “readers” of the histone methylation status, recognizing monomethylated H3K4 (H3K4me1) while the catalytic Su(var)3-9 and 'Enhancer of zeste' (SET) domain, located in the C-terminus, are the “writer” that adds methyl- groups to complete the methylation process [21]. *KMT2C* is commonly mutated in high grade muscle-invasive urothelial carcinoma [7], in which, mutations were recently found equally distributed within the two major subtypes, luminal-papillary and basal-squamous [11]. Little is known however, about low grade/early stage tumors, including superficial papillomas. To address this issue, we sequenced the N- and C-terminus of the *KMT2C* transcript in tumors and matching normal tissues from a cohort of 72 patients diagnosed with superficial or muscle-invasive urothelial cancer of variable grade [22]. We identified mutations primarily within PHD fingers 1-3 (Figure 1A), which showed no statistical preference with respect to grade and stage (mutations were

found in 12/43 high grade vs. 4/29 low grade, and 9/32 invasive vs. 7/40 superficial tumors). Interestingly, a recent study on non-invasive bladder cancer also identified a high frequency (15%) of *KMT2C* likely loss-of-function mutations in non-invasive bladder cancer [20], indicating that *KMT2C* inactivation might occur early in carcinogenesis. In our mutation detection study, both frameshift and missense mutations were identified, the vast majority of which are predicted to be damaging (Figure 1A and Table EV1). Recently identified missense mutations within the PHD fingers 1-3 have been shown to disrupt the interaction between *KMT2C* and BAP1 leading to reduced recruitment of *KMT2C* to gene enhancers [1]. Our *KMT2C* expression analysis in 104 matched normal/cancer tissue pairs from an expanded bladder cancer patients cohort (n=138) (Appendix Tables S1, S2), revealed that, in comparison to normal tissues, *KMT2C* expression is downregulated in the majority of tumors both at the RNA and protein level (71/104,  $P < 0.001$ ; Figure 1B, C).

*KMT2C* is mutated in several epithelial cancers [8] implying a general role as a tumor suppressor. To investigate this hypothesis, we performed a meta-analysis on publically available RNA-seq data from The Cancer Genome Atlas (TCGA) consortium [23-26]. We found that similarly to bladder cancer (BC), *KMT2C* is downregulated in comparison to normal tissue in colorectal adenocarcinoma (COAD), non-small cell lung cancer (NSCLC) and head and neck squamous cell carcinoma (HNSCC; Figure 1D). These data indicate that *KMT2C* downregulation is a rather common event in tumorigenesis in several human epithelial tissues. On the other hand, a recent report [27] and our own meta-analysis of non-epithelial cancers with the use of the GEPIA web server [28] indicated that, in comparison to respective healthy tissue, *KMT2C* is expressed at higher levels in glioblastoma multiforme (GBM), brain lower grade glioma (LGG), diffuse large B-cell lymphomas (DLBL), acute myeloid leukemia (AML) and sarcomas (SARC; Appendix Figure S1). This is in agreement with the fact that *KMT2C* truncating mutations account for only 0.6% in these cancer types (2/397, 2/512, 0/41, 3/200 and 2/254 cases, respectively; not shown).

Our meta-analysis of publicly available DNA methylation data [7] obtained from the MethHC database [29] indicate that two Illumina methylation detection probes (cg17322443 and cg19258062) located within a CpG island (chr7:152435133-152437025, assembly GRCh38/hg38, ENCODE) spanning the *KMT2C* proximal promoter are subject to DNA methylation in bladder tumor samples, while remaining methylation-free in normal tissue (Figure EV1A, B), confirming a previously published report [30]. More importantly, the

same CpG island within the *KMT2C* proximal promoter is also hypermethylated in tumor samples from COAD, NSCLC and HNSCC (Figure EV1C). Collectively, these data indicate that both mutational inactivation and transcriptional downregulation *via* promoter methylation of *KMT2C* might contribute to reduced activity facilitating tumor development in several epithelial cancers.

### **KMT2C loss affects enhancer activity and gene expression in a subset of genes**

To investigate its role in urothelial carcinoma cells, we used two independent shRNAs (KD1/KD2) to knock down KMT2C levels in human BC cell lines (Figure 2A). While the loss of KMT2C activity did not affect cell proliferation or apoptosis (Appendix Figure S2), RNA-seq experiments in HTB9 cells showed that, directly or indirectly, 3324 genes were transcriptionally affected upon *KMT2C* silencing (1.4-fold and higher change in expression levels). Of those, 1846 were downregulated while 1478 were upregulated. Gene ontology (GO) analysis indicated that many of the affected genes are involved in DDR, DNA repair, DNA replication, cell cycle control and apoptosis, all of which are considered hallmarks of cancer, and are associated with tumor aggressiveness [31] (Figure 2B). In order to study directly the role of KMT2C and to circumvent the lack of chromatin immunoprecipitation (ChIP)-grade anti-KMT2C antibodies, we exogenously expressed a Flag-tagged KMT2C protein (fKMT2C) in HTB9/KD1 cells (Figure 2C).

To gain further insight into the function of KMT2C in gene transcription regulation, we used fKMT2C-complemented HTB9/KD1 cells to map KMT2C binding genome-wide through ChIP-sequencing (ChIP-seq). In addition, to measure the epigenetic effects of KMT2C loss we performed ChIP-seq experiments for histone 3 lysine 27 acetylation (H3K27ac), histone 3 lysine 4 trimethylation (H3K4me3) and histone 3 lysine 9 acetylation (H3K9ac) histone modifications on HTB9 KMT2C/KD1 and control Scr cells. ChIP-seq experiments performed with anti-Flag antibodies indicated that KMT2C binding sites are equally dispersed among promoter, gene body and intergenic regions (12417, 10882 and 9885 peaks, respectively; Figure 2D).

In agreement with its role in enhancer regulation, KMT2C colocalizes with the active enhancer mark H3K27ac on intergenic sites likely representing active enhancers [32] (Figure 2E). Our ChIP-Seq analysis identified 2808 genes proximally located to enhancers that are characterized by KMT2C binding and significant H3K27ac loss upon KMT2C silencing. GO analysis on genes of this group that are also downregulated upon KMT2C

silencing (1.5-fold or higher reduction) revealed an enrichment in processes such as focal adhesion and integrin-mediated adhesion as well as ErbB and Wnt signaling pathways (Figure 2F). More specifically, we identified genes that encode proteins which are critical for cell adherence to the epithelial basement membrane: *ITGB1*, *ITGB6*, *RHOB*, a putative tumor suppressor also commonly mutated in BC [7, 20], *MMP7*; Figure 2G); the extracellular matrix organization *LOXL2*, *LOXL4*, an epigenetically silenced putative tumor suppressor in bladder carcinoma [33], *TIMP4*), and epithelial development and differentiation (*SMAD6*, *SOX2*, *EREG*, *WNT11*, *BMP2*). Interestingly, KMT2D/MLL4, was recently reported to regulate the enhancers of genes involved in cell-cell and cell-matrix adhesion as well as in differentiation of keratinocytes affecting the expression of *ITGB2*, *ITGB4*, *LOXL1*, *LOXL2*, *SOX7*, *WNT10A* genes by a similar way [34]. An analysis of transcription factor binding motifs in KMT2C peaks located at enhancers that are characterized by significant H3K27ac loss upon KMT2C silencing, identified JUNB, TEAD, RUNX1 and MAFA as the most enriched transcription factors (Figure 2H).

### **KMT2C localizes at promoters and controls the expression of DNA damage response and repair genes**

Interestingly, our ChIP-seq experiments also revealed 12417 fKMT2C binding sites enriched at transcription start site proximal regions (TSS±1500 bp) that contain large domains of H3K4me3 H3K9ac and H3K27ac marks (Figure 3A, B). *KMT2C* silencing, was associated with transcriptional suppression of 1368 genes, which are characterized by promoter-only KMT2C binding. This finding indicates that besides enhancer regulation, KMT2C is also involved in promoter activation in cancer cells. Transcription factor binding motif analysis of fKMT2C-bound regions yielded a totally different set of transcription factors from those identified in enhancers. The most prominent of these is ELK1 (Figure 3C), a prominent RAS/MAPK target controlling components of the basal transcriptional machinery, the spliceosome and the ribosome [35].

Our ChIP-seq and RNA-seq data indicated that upon *KMT2C* silencing, the subgroup of genes showing reduced expression levels also show reduced H3K4me3 levels at the respective TSSs (Figure 3D). GO analysis on this group of the 1368 downregulated genes revealed several processes such as DDR and DSB repair by HR, which interestingly presented the highest score (see also Figure 2B). More specifically, *KMT2C* silencing was associated with decreased expression of key DDR components of DNA response (*ATM*,

*ATR*) and HR DNA repair pathway (*BRCA1*, *BRCA2*, *RAD50*, *RAD51*) (Figure 3E). Interestingly, restoration of KMT2C activity by means of exogenous expression of fKMT2C, also restored the expression levels of these genes (Figure 3F).

Our own ChIP-seq data as well as ENCODE data indicate that KMT2C and the COMPASS complex component RBBP5 colocalize together with ELK1 upon the TSS of *ATM*, *ATR*, *BRCA1* and *BRCA2* genes (Figure 4A). Moreover, KMT2C levels modulate positively the H3K4me3 enrichment on TSS of these genes indicating an important role for this histone methyltransferase on their transcriptional activation. More specifically, upon *KMT2C* silencing, H3K4me3 levels were significantly reduced, whereas restoration of KMT2C activity also restored H3K4me3 levels. Promoter region immunoprecipitation either as direct binding or through long range enhancer interactions has previously been reported for both KMT2C and KMT2D [36, 37]. KMT2C binding upon the promoter region of the *ATM*, *ATR*, *BRCA1* and *BRCA2* genes is independently corroborated in a recently published analysis [38] (Appendix Figure S3). Interestingly in the same study, a 32% of KMT2C is located within promoter regions indicating roles for KMT2C beside enhancer H3K4 monomethylation.

This observation prompted us to knock down *KMT2C* expression in a wide panel of BC, COAD, HNSCC, and NSCLC cell lines which according to publically available data showed variable KMT2C expression levels (Figure 4B). Quantitative RT-PCR experiments revealed an invariable downregulation of DDR and HR components (Figure 4C). Finally, expression analysis of our cohort of bladder cancer tumors (Figure 4D), as well as meta-analysis of publicly available TCGA expression data from BC, COAD, NSCLC and HNSCC indicated that *KMT2C* levels strongly correlate with the expression of the same genes (Figure 4E). Interestingly, a positive correlation between *ATM*, *ATR*, *BRCA1*, *BRCA2* and *KMT2C* expression is also derived from TCGA data GBM, LGG, AML, DLBL, SARC and breast invasive carcinoma (BRIC) RNA-seq data (Appendix Figure S4). Altogether, these data indicate that KMT2C controls the epigenetic status of genes involved in DDR and DNA repair and directly or indirectly their expression levels, even in tissues in which a tumor suppressor role of KMT2C has yet to be established. Deficiencies in DNA repair due to germline or somatic mutations is a common event in cancer [39], while reduced expression of DNA repair components due to epigenetic control, primarily DNA methylation, is also observed [40, 41]. In this case, however, loss of KMT2C seems to affect *en bloc* the expression of multiple key components of the DDR and DNA repair pathways.

## **Bladder cancer cells lacking KMT2C are HR-deficient and present high levels of genomic instability**

The observation that KMT2C loss affects genes involved in DDR and DNA repair prompted an in depth cytogenetic analysis which revealed that both HTB9 and T24 cells lacking KMT2C show increased DNA damage as indicated by higher frequency of nuclear foci staining for the DNA damage marker  $\gamma$ H2AX. DNA damage levels are comparable to those measured in *BRCA1* knockdown cells (Figure 5A and Figure EV2A). Cisplatin is known to cause DSBs which in cells beyond the G1 phase are repaired by the HR machinery. To assess the contribution of HR in DSB repair, we treated HTB9 and T24 cells with cisplatin and immunostained against  $\gamma$ H2AX and the HR repair protein RAD51. While both Scr control and KD cells showed the same frequency of  $\gamma$ H2AX foci, RAD51-positive nuclei were significantly fewer in the latter (Figure 5B and Figure EV2B). Moreover, sister chromatid exchange (SCE) assays upon cisplatin treatment clearly demonstrated that, while Scr control cells are HR competent, their KD counterparts show low levels of HR DSB repair (Figure 5C and Figure EV2C). It is known that HR factors stabilize stalled forks by protecting them from nucleolytic degradation, help restarting DNA synthesis from stalled forks and repair DSBs generated by collapsed forks [42-46]. To investigate the ability of KMT2C/KD cells to resolve stalled forks in S phase, we used DNA fiber assays. In the presence of the DNA replication inhibitor hydroxyurea (HU), KMT2C/KD cells show a behavior similar to that of BRCA1-deficient cells, i.e. inability to resolve stalled forks (Figures 5D and Figure EV2D). These functional data indicate that loss of KMT2C leads to HR deficiency due to downregulation of multiple HR components, as well as compromise of DNA replication under genotoxic stress.

Interestingly, stalled or collapsed replication forks are a major source of DSBs and endogenous genomic instability in dividing cells [47]. In cancer, oncogene-induced replication stress contributes critically to DNA damage while cancer cells with HR deficiency are characterized by extensive genomic instability [48, 49]. Chromosomal instability, as a type of genomic instability, has been also linked to HR deficiency and mitotic defects [50, 51]. In KMT2C/KD cells, the increased frequency of micronuclei, chromosome bridges, lagging chromosomes and chromosome congression (Figure 6A, B) imply gross defects in mitotic fidelity and genome integrity safeguarding. To assess the chromosomal status of KMT2C/KD cells, we used gross karyotypic analysis which revealed that both HTB9 and T24 KMT2C/KD cells had lower chromosomal count in total and per individual chromosome (Figure 6C, D). Moreover, chromosomal microarray analysis



(CMA) on HTB9 cells indicated that chromosomal losses were more frequent and more extensive than respective gains (Figure 6E, F).

### **KMT2C loss leads to PARP1/2-dependence for DNA repair**

Our expression and cytogenetic data clearly indicate that the HR repair machinery is compromised in KMT2C/KD cells. HR deficiency is known to skew the balance towards canonical-nonhomologous end joining (c-NHEJ) with the participation of the TP53BP1 protein [52]. However, the number of TP53BP1 foci in cisplatin-treated KMT2C/KD cells is comparable with Scr control cells (Figure 7A and Figure EV3A), possibly implying that the activity of c-NHEJ is not elevated. To this direction, we compared the activity of NHEJ pathway between KMT2C/KD1 and Scr control cells by counting chromosomal fusion events in a dicentric assay. Repair of DSBs induced by ionizing radiation (IR) in this assay generated chromosomal fusions with equal frequency between KMT2C/KD1 and Scr control cells (Figure 7B and Figure EV3B), implying that both employ non-HR mechanisms for DNA repair equally. It is widely accepted that ligase IV participates in the final stages of the c-NHEJ [53], while poly (adenosine diphosphate [ADP]–ribose) polymerase 1 (PARP1) is an integral component of the alt-EJ pathway [54, 55]. To assess the individual contribution of c-NHEJ and alt-EJ in DNA repair, we induced DSBs via IR in both Scr control and KMT2C/KD1 cells and measured the frequency of chromosomal fusions in the presence of the ligase IV inhibitor SCR7 [56] or the PARP1/2 inhibitor Olaparib [57]. Inhibition of PARP1/2 in KMT2C/KD cells led to a significant reduction ( $P<0.01$ ) in the number of chromosome fusions, while ligase IV inhibition had a lesser effect (Figure 7C and Figure EV3C). This implies that KMT2C/KD cells rely heavily on alt-EJ for DSB repair. PARP1/2 inhibition in BRCA-deficient cells is known to lead to accumulation of chromosome fragments and radial structures, a phenotype associated with c-NHEJ [52, 58, 59]. As Figure 7D indicates, blocking the alt-EJ pathway with Olaparib leads to significantly ( $P=0.021$ ) more radial chromosomes in comparison to Scr controls, while simultaneous treatment with Olaparib and SCR7 ameliorated this phenotype. Comparable results were obtained when the c-NHEJ and alt-EJ pathways were genetically inhibited through shRNA knockdown of Ligase IV and III, respectively (Figure EV4A, B). This further supports the hypothesis that, in KMT2C/KD cells, the alt-EJ pathway plays a more important role in DSB repair.

## **Tumors with KMT2C loss are sensitive to PARP1/2 inhibition**

Previous reports have shown that HR-deficient cells are sensitive to PARP1/2 inhibitors [58, 60]. In fact, recently published results from a Phase II clinical trial indicated that patients with castration-resistant prostate cancer that carry mutations in DNA repair genes, such as *BRCA1/2*, *ATM*, Fanconi Anemia components and *CHEK2*, show positive response to Olaparib, indicating a dependence on PARP1/2 for survival upon DNA damage [61]. In agreement with this, KMT2C/KD cells show increased sensitivity to Olaparib (Figure 8A). This observation was also confirmed in long term treatments in clonogenic assays with three different concentrations of Olaparib (Figure EV5). Moreover, generation of DSBs through IR is detrimental for Olaparib-treated KMT2C/KD cells, underscoring the dependence of these on PARP1/2 for DNA repair (Figure 8B). These findings are independently corroborated from publically available data from the *cancerrxgene.org* database [62] which show that cell lines from BC, NSCLC, HNSCC and COAD with reduced expression of KMT2C are more sensitive to PARPi (Figure 8C).

To corroborate our finding *in vivo*, we used one cell line from each tumor type under study in xenograft experiments (HTB9/BC, H1437/NSCLC, T84/COAD and Cal-33/HNSCC). Although, T84 and Cal-33 KMT2C/KD cells grew somewhat slower *in vivo* in comparison to the respective Scr controls, KD1 cells are more sensitive to Olaparib which totally suppressed tumor grown in mice (Figure 8D). This was associated with reduced proliferation, high DNA damage and severe apoptosis in KD1 cells all cell lines tested (Figure 8E). Altogether, our *in vitro* and *in vivo* experiments indicate that KMT2C/KD cells rely heavily upon alt-EJ for DSB repair. Although, we cannot exclude alt-EJ-independent PARP1/2 functions in DNA repair, we hypothesize that upon inhibition of alt-EJ, KMT2C/KD cells rely exclusively upon c-NHEJ for DSB repair. This however, is either insufficient or too error prone to deal with elevated DNA damage, eventually leading to cell death.

## **DISCUSSION**

Histone modifying enzymes have emerged as critical players in tumor biology in recent years. H3K4 methyltransferases have been implicated in tumorigenesis both as oncogenes and tumor suppressors in a variety of neoplasias. Bladder cancer presents some of the highest reported mutation rates in *KMT2C* and *KMT2D*, and to a lesser extent in *KMT2B* [7, 11, 63]. A high percentage of reported mutations lead to truncated protein products with presumably impaired functionality. Recent reports, however, indicate that loss of the

catalytic activity of KMT2C and KMT2D has a less severe effect on transcription regulation than the respective complete gene knockout [16, 17], implying that these proteins may have additional roles in transcriptional regulation beyond H3K4 monomethylation.

In support of this, loss of the catalytic activity of the *Drosophila* homolog *Trithorax* (*Trr*) has negligible effect on fly development, while its complete loss leads to embryonic lethality [64, 65]. Therefore, somatic mutations, even those truncating the protein from its catalytic activity, might not be the only MLL-related genetic event associated with cancer. These observations prompted us to focus our studies on the expression levels of KMT2C, and its role in already transformed cells. We report for the first time that the epigenetic regulator KMT2C is significantly downregulated in many different types of cancer. We thus speculate that loss-of-function mutations in combination with progressively reduced gene expression due to promoter methylation, limit KMT2C activity in cancer cells. Thus, in tumor evolution, promoter methylation of *KMT2C* may provide a selective advantage to emerging *KMT2C* mutated cells by reducing wild type protein levels. In support of this model, *KMT2C* mutations were recently identified as late events in sub-clones of lung adenocarcinomas during tumor evolution [66] and in metastatic breast cancer subclones [67].

Functionally, KMT2C and the related KMT2D protein direct H3K4 monomethylation which poises enhancers for activation and transcription factor binding, thus regulating the transcription of neighbor genes [68, 69]. In addition to its catalytic role in H3K4me1 deposition, KMT2C interacts with the histone acetyltransferase complex CBP/p300 and the H3K27 demethylase UTX to promote H3K27 acetylation and enhancer activation [68]. The precise control of transcriptional networks through enhancers is important for the tissue specific expression pattern of developmental genes and plays a crucial role in establishing and maintaining cell fate and identity [70]. Recent studies, however, have shown that alterations in enhancer epigenetic landscape also correlate with tumorigenesis [71-73]. The reduced expression of KMT2C in bladder epithelial tumor cells leads to a substantial loss of H3K27 acetylation in a subset of active enhancers that control expression of genes involved in focal adhesion, adherens junctions, migration, epithelial cell development and differentiation. In a recent study by Lin-Shiao and colleagues, loss of KMT2D activity by shRNA silencing in primary neonatal human epidermal keratinocytes (NHEKs) and spontaneously immortalized human epidermal keratinocytes (HaCaTs) revealed an important regulatory role of KMT2D in enhancer of genes involved in the same processes [34]. This may imply that KMT2C and KMT2D proteins exert coordinated and synergistic

functions in enhancer elements and their loss during carcinogenesis deregulates cell adhesion and signaling with profound effects to tumor progression and invasion. Previous reports have shown that concomitant loss of KMT2C and the tumor suppressor protein TP53 expedites tumor formation in mice [13], implying a preferential collaboration between the two. Our own meta-analysis of the publically available TCGA RNA-seq and mutation data failed to substantiate any consistent correlation between *TP53* mutation status and *KMT2C* expression levels or mutation status (Appendix Figure S5A, B). Moreover, a similar meta-analysis on cancer cell lines also failed to identify any correlation between *TP53* mutation status and *KMT2C* expression (Appendix Figure S5C). Whether the reported connection between KMT2C and TP53 is species or tissue-specific, or whether a more universal connection between the proteins exists, are questions that would require further experiments to be addressed.

Upon KMT2C reduction, profound gene expression changes are observed. Several genes involved in DDR and DNA repair are downregulated, seemingly due to loss of KMT2C binding on their proximal promoters. Expression downregulation in these cases is associated with reduction in H3K4me3 levels. Although other H3K4 methyltransferases have been found to regulate promoter activity [74, 75], this is the first time that KMT2C is found upon promoter regions and implicated in transcription activation, including DDR and DNA repair proteins. Whether transcription factors mediating oncogenic programs in cancer cells, such as ELK1 downstream of the RAS/MAPK cascade, are responsible for KMT2C recruitment onto promoter regions is a hypothesis that warrants further investigation. It is relevant in this respect that the implication of KMT2C in transcriptional regulation of these genes is confirmed in published TCGA datasets.

Cells with reduced KMT2C levels behave as HR-deficient despite the fact that BRCA proteins and other HR components are not mutated. HR deficiency as a result of epigenetic regulation of BRCA expression levels has also been described (reviewed by Konstantinopoulos and colleagues) [76]. On the other hand, the alt-EJ pathway assumes a critical role, potentially due to HR deficiency. This explains the increased sensitivity of KMT2C/KD cells to PARP1/2 inhibition and offers a promising treatment alternative for KMT2C<sup>low</sup> cases. Because PARP1/2 participate in the repair of single strand breaks (SSB; also induced during DNA replication), we cannot exclude the possibility that the increased sensitivity of KMT2C/KD cells to PARPi is also due to unrepaired SSBs which contribute to excess DNA damage. Interestingly, synthetic lethality between PARP inhibition and BRCA1/2 loss has been solidly established and already exploited in the clinic [77] while a

similar link has been established in preclinical models lacking ATM [78]. Our results will hopefully trigger further studies aiming to investigate the relationship between the epigenetic landscape and DNA damage response.

### **Material and Methods**

**Human specimens:** Bladder tissue specimens were obtained from 138 patients diagnosed with primary urothelial carcinoma of the bladder. Bladder cancer patients underwent transurethral resection of bladder tumors (TURBT) for non-muscle invasive bladder cancer (Ta, T1) or radical cystectomy (RC) for muscle-invasive bladder cancer (T2–T4). All patients were treated at “Laiko” General Hospital, Athens, Greece (Appendix Tables S1, S2). Whenever feasible, normal adjacent tissue specimens from 104 of the same patients were included in the study as reference samples, following pathologist’s evaluation for absence of CIS and dysplasia. Tissue samples (tumors and normal adjacent specimens) were sectioned into two mirror-image specimens, one of which was submitted to pathologist’s evaluation, while the other one was immediately frozen in liquid nitrogen and stored at –80 °C until further processing. All patients were diagnosed with urothelial carcinoma on the basis of histopathological criteria, and none of the patients had received any kind of neoadjuvant therapy prior to surgery. No inclusion or exclusion criteria were used other than tissue quality after thawing. Our study was performed according to the ethical standards of the 1975 Declaration of Helsinki, as revised in 2008, and was approved by the ethics committee of “Laiko” General Hospital. Informed consent was obtained from all the participating patients.

**Sanger sequencing:** Total RNA from bladder tissue from a previously described cohort<sup>22</sup> was reverse transcribed with random primers and used in PCR reactions to obtain overlapping amplicons 600–800 bp that cover the portion of *KMT2C* coding region of interest. The oligonucleotide sequences used are provided in Appendix Table S5. PCR fragments were sequenced in both strands with standard Sanger sequencing procedures.

**Cell culture:** All cell lines were originally purchased from ATCC. Cells were cultured in Dulbecco’s Modified Eagle Medium (Sigma-Aldrich, cat. D6429) supplemented with 10% heat-inactivated fetal bovine serum (Biosera, cat. FB-1001/500) and penicillin (100 units/ml)/streptomycin (100 µg/ml) (Thermo Fischer Scientific, cat. 15140122) at 37 °C

with 5% CO<sub>2</sub>, with the exception of H1437 and H1792 which were cultured in RPMI-1640 medium (Sigma-Aldrich, cat. R8758).

**Lentivirus production, infection and shRNA knockdown:** Scramble, anti-KMT2C and anti-BRCA1 short hairpin RNA-producing DNA sequences were cloned in PLKO.1-puro-IRES-gfp plasmids. To produce replication-incompetent lentivirus, 293T cells were co-transfected with either Lenti-Scr-GFP or lenti-shKMT2C-GFP constructs in combination with the pMD2.G and psPAX2 plasmids (Addgene, cat. #12259 and #12260) using the CaCl<sub>2</sub> precipitation method. Twelve hours later, growth medium was replenished. Viral supernatants were harvested 36h & 70h post-transfection. Cell lines were infected overnight with filtered viral supernatants. Three days post infection, cells were selected with 5-10µg/ml Puromycin (Sigma-Aldrich, cat. P8833) over a period of 7 days. TRCN0000008744 and TRCN000000743 (Sigma-Aldrich) shRNA clones against KMT2C were used for generation of KMT2C/KD1 and KMT2C/KD2 cells respectively. TRCN0000039834 (Sigma-Aldrich) shRNA clone against BRCA1 was used for generation of BRCA1/KD cells. Scramble, anti-DNA ligase III (TRCN0000048502) and anti-ligase IV (TRCN0000009847) short hairpin RNA-producing DNA sequences (Sigma-Aldrich) were cloned in PLKO.1-blast plasmid ( Addgene: #26655). Lentiviral supernatants generated using these plasmids were used to infect HTB9 and T24 KMT2C/KD1 cell lines. Three days post infection, cells were selected with 10µg/ml blasticidin over a period of 12 days for the generation of KMT2C/KD1 cell lines with DNA ligase III or IV knockdown.

**ChIP-seq preparation and analysis:** Chromatin was prepared from Scr control and KMT2C/KD HTB9 cells with the SimpleChIP® Enzymatic Chromatin IP Kit (Cell Signaling, cat. 9003) according to the manufacturer's instructions. Libraries were prepared in Greek Genome Center (GGC) Biomedical Research Foundation of Academy of Athens (BRFAA) as previously described [79] and sequenced on the Illumina platform. Single-end 85 bp reads for H3, H3K27ac, H3K4me3 and H3K9ac were generated with the NextSeq500 in the GGC. All ChIP-seq data were aligned to human genome version GCh37/hg19 with the use of bowtie2 (version 2.1.0) [80] and «--very-sensitive» parameter. Samtools (version 0.1.19) [81] were used for data filtering and file format conversion. MACS (version 1.4.2) algorithm [82] was used for peak calling with H3 ChIP as control. Gene annotation and genomic distribution of the peaks identified by MACs was performed with BEDTools [83]

and graph representation (heatmaps) of the tag – read density around TSS was performed with seqMiner (version 1.3.3) software [84]. ChIP-seq data have been deposited in the Short Read Archive (SRA) under the BioProject ID: PRJNA508740.

**RNA-seq preparation and analysis:** Library preparation for RNA-seq was carried out in the GGC of BRFAA. RNA was isolated from Scr control and KMT2C/KD cells and RNA-seq libraries were prepared using the TruSeq RNA kit using 1 µg of total RNA. The libraries were constructed according to Illumina's protocols and equal amounts were mixed and run in the Illumina NextSeq500 in the GGC. Single-end 85 bp reads for three Scr control and three KMT2C/KD samples were generated. RNA-seq raw sequencing data were aligned to human genome version GCh37/hg19 with the use of TopHat (version 2.0.9) [85] with the use of «-b2-very-sensitive» parameter. Samtools (version 0.1.19) [81] were used for data filtering and file format conversion, while HT-seq count (version 0.6.1p1) algorithm [86] was performed for assigning aligned reads into exons using the following command line «htseq-count -s no -m intersection -nonempty». Finally differentially expressed genes were identified with the use of the DESeq R package [87] and genes with fold change cut off 1.5 and  $p\text{-adj} \leq 0.05$  were considered to be differentially expressed (DEGs). Gene ontology and pathway analysis was performed in the DEGs with the DAVID knowledge base [88] and Ingenuity Pathway Analysis software (IPA). Only pathways and biological processes with  $p\text{-value} \leq 0.05$  were considered significantly enriched. RNA-seq data have been deposited in the Short Read Archive (SRA) under the BioProject ID: PRJNA508526.

**CMA analysis:** The Chromosomal Microarray Analysis (CMA) was performed with the high resolution 2x400K G3 CGH+SNP microarray platform (G4842A, Design ID 028081, Agilent Technologies, Santa Clara, CA, USA). The specific platform features a total of 292,097 oligonucleotide CGH probes covering the whole genome, with a median CGH probe spacing of 7kb, as well as 118,955 Single Nucleotide Polymorphism (SNP) probes for the detection of Copy-Neutral Loss of Heterozygosity (CN-LOH), resulting in a resolution of 5-10Mb for CN-LOH. The wet-lab protocol was according to the manufacturer's instructions (Agilent Oligonucleotide Array-Based CGH for Genomic DNA Analysis), and consisted of enzymatic digestion of genomic DNA in parallel with a sex-matched reference DNA (Agilent Technologies, Santa Clara, CA, USA) with restriction enzymes AluI and RsaI, followed by differential labeling with Cy3 and Cy5 fluorescent dyes for sample and reference, respectively. Following purification, the combined labeled DNA samples were

applied to the microarray (hybridization for 40 hours at 67°C), washed and scanned at 3 micron resolution on the Agilent High-Resolution Microarray Scanner (G2505C, Agilent Technologies, Santa Clara, CA, USA). The images were extracted and analyzed using the Agilent Feature Extraction software and the CytoGenomics v.3.0 software suite. The ADM-1 aberration detection algorithm was utilized, and the minimum number of probes required for a call was set to 4.

**Real-time qPCR:** For human tissue samples, total RNA was isolated, following the pulverization of 40-100 mg of bladder tissue specimens, with the use of TRI reagent (Molecular Research Center, Inc., Cincinnati, OH, USA) and reverse transcribed with MMLV reverse transcriptase (Invitrogen, Carlsbad, CA, USA) using oligo-dT primers. For cell lines, total RNA was isolated with the use of TRI reagent and reverse transcribed with PrimeScript™ RT reagent Kit (Takara, RR037A) using oligo-dT and random primers. Quantitative PCR was performed in the 7500 Real-Time PCR System using the sequence detection software (Applied Biosystems, Carlsbad, CA, USA). The 10 µl reaction mixture consists of Kapa SYBR Fast Universal 2× qPCR Master Mix (Kapa Biosystems, Inc., Woburn, MA, USA). Melting curve analysis were performed following the amplification in order to distinguish specific reaction products from non-specific ones or primer-dimers. Gene expression analysis was carried out using the  $2^{-\Delta\Delta CT}$  relative quantification method [89]. Duplicate or triplicate reactions were performed for each tested sample, and the average CT was calculated for the quantification analysis. *HPRT1* was used as an endogenous reference control. Oligonucleotide sequences are provided in Table S8.

**Immunofluorescence experiments:** Cells were plated on poly-L-lysine (Sigma, cat. P1274) coated coverslips. Cells were fixed by 10 minute incubation in 4% paraformaldehyde (Alfa Aesar, 30525-89-4) at room temperature, permeabilized for 4 min in 1x PBS/0.5% Triton X-100, washed with PBS and blocked in 1% bovine serum albumin (Applichem, cat. A1391,0100), 10% fetal bovine serum in PBS. Cells were incubated with primary antibody (Appendix Table S7) overnight at 4°C, followed by incubation with a fluorescent secondary antibody for 1 h at room temperature as previously described [90]. Antibody solutions were made in PBS with 1% bovine serum albumin. Coverslips were mounted on glass slides using VECTASHIELD Antifade Mounting Medium with 49,6-diamidino-2-phenylindole (DAPI) for DNA staining (Vektor, cat. H-1200). For DNA repair experiments cells were treated with 2µM cisplatin for 6h. For tissue stainings, tumors were fixed in 4% formaldehyde at 4 °C,



thoroughly washed in PBS, placed in 30% sucrose overnight and frozen in optimal cutting temperature (OCT) compound (Tissue Tek, Sakura). Frozen 10 µm sections were obtained using a Leica (CM1950) cryostat. Sectioned tissues were washed three times in PBS, blocked for 1 h and incubated with primary and secondary antibodies as described. Image processing and foci counts were performed using ImageJ.

**Cytogenetics and FISH:** Standard procedures were used for chromosome preparation and staining [91]. Briefly, cells were treated with 10µg/ml Colcemid<sup>TM</sup> (Thermo Fisher Scientific, catalog No. 15210040) for 1 hour, harvested, treated with 75 mM KCl for 20 minutes, fixed in methanol/glacial acetic acid (3:1, v/v) and processed for cytogenetic analysis. Imaging and karyotyping were performed via microscopy and computer imaging techniques. At least thirty metaphases per cell line were karyotyped. Karyotypes were analyzed according to the International System for Human Cytogenetic Nomenclature (ISCN) 2013.

**MTT cell viability assays:** For cell viability assays, cells were plated at 6-10 X 10<sup>3</sup> per well in 48-well plates and incubated with complete Dulbecco's Modified Eagle Medium (DMEM) or RPMI 1640 medium containing different concentrations of Olaparib as indicated in the respective figure legend. Assays were performed using the standard MTT colorimetric assay (Sigma, cat. M5655) according to the manufacturer's instructions. Measurements were analyzed using Graphpad Prism v6.

**Soft agar clonogenic assays:** Basal anchorage-independent growth inhibition of Olaparib was assessed by a double-layer soft agar assay. Cells (5x10<sup>4</sup>) were suspended in complete medium containing 0.35% agar and increasing Olaparib concentrations, and seeded in triplicate in 24-well plates onto a base layer of complete medium containing 1% agar. Medium was replenished every 3-5 days for 15-20 days, before colony counting. Image processing and colony counts were performed using ImageJ.

**Mice:** Male NOD/SCID mice were purchased from the Jackson repository and bred in individually ventilated cages at the Animal House Facility of the Foundation for Biomedical Research Foundation of the Academy of Athens (Athens, Greece) under veterinarian supervision. All procedures for care and treatment of animals were approved by the

Institutional Committee on Ethics of Animal Experiments and the Greek Ministry of Agriculture. Cells were injected when mice reached the age of 4-6 weeks. For *in vivo* treatments, cells were injected in the flanks and when tumors reached a palpable size (2-3 mm in diameter or dimension) mice were randomly assigned to groups. No exclusion criterion was applied. The Olaparib therapy group was intraperitoneally administered with either vehicle or Olaparib injection (AZD2281, MedChem express, at a dose of 50mg/kg in PBS solution containing 12.5% DMSO and 12.5% kolliphor) following the cycling dosing scheme OROOR (O: Olaparib or Vehicle, R: Rest) for 21 days. Tumors were dissected and weighed 24 hours after the last treatment. Tumor volume measurements were performed every three days using caliper.

**Ionizing radiation experiments:** Irradiation was carried out in a GammaCell 220 irradiator (Atomic Energy of Canada Ltd., Ottawa, Canada) at room temperature. For chromosomal fusion events analysis, cells synchronized at the G0/G1 phase by growing the cell cultures to confluency followed by serum deprivation for 48h (0.1% to 0.25% serum) [92]. Cells were exposed to ionizing radiation (6Gy) and incubated at 37 °C for 6 hours to recover. At 6h post-irradiation, cells were trypsinized and cultured with fresh medium for 30 hours. Subsequently, cells were treated with colcemid for 1h to arrest dividing cells at metaphase and processed for chromosome preparation and staining as previously described. For drug treatments, cells were exposed to 15µM Olaparib and/or 30µM SCR7 (MedChem Express, cat. HY-12742) 24h prior to irradiation until metaphase harvesting. For each experiment, 30 metaphases were scored. Experiments were repeated thrice. Light microscopy was coupled to an image analysis system (MetaSystems, Altlußheim, Germany) to facilitate scoring.

**Protein extraction and western blot analysis:** Cells were lysed in RIPA lysis buffer (150 mM NaCl, 50 mM Tris-HCl pH 8, 1% Igepal, 0.5% sodium deoxycholate, 0.1% SDS) that was added with a protease inhibitor cocktail (Complete, Roche). A total protein amount of 20 µg from each samples was denatured at 95 °C for 10 min in Laemmli buffer containing β-mercaptoethanol before electrophoresis. The primary antibodies that were used are described in Appendix Table S7.

**DNA fiber assay:** Asynchronous cell cultures were treated with 25 µM IdU (Sigma-Aldrich, I7125) for 20 min, washed with PBS and exposed to 250 µM CldU (Sigma-Aldrich, C6891) for 20 min (-HU) or exposed to 250 µM CldU and 0.2 mM hydroxyurea for 60 min (+HU).

After exposure to CldU, cells were washed in PBS and harvested. Cells were then lysed and DNA fibers stretched onto glass slides and fixed as described [93]. Fibers were denatured with 2.5M HCl for 80 min, washed with PBS and blocked with 2% BSA in phosphate buffer saline for 30 min. The newly synthesized IdU and CldU tracts were visualized with anti BrdU antibodies recognizing IdU (1:50 BD Biosciences, 347580) and CldU (1:400 Abcam, ab6326), respectively. Images were taken at 60x magnification using a Leica DM RA2 fluorescence microscope equipped with a Hamamatsu ORCA-Flash 4.0 V2 (sCMOS-Monochrome, 4Mpixel) camera and analyzed using ImageJ software. Statistical analysis was carried out using GraphPad Prism.

**Sister chromatid exchange:** Cells ( $1 \times 10^5$ ) were plated in a 10 cm dish. At 24 h, cells were treated with 5  $\mu$ M cisplatin. At 3h post cisplatin treatment, cells were washed with fresh medium and treated with 5 mg/ml BrdU (Sigma-Aldrich, cat. B5002) for 40 hours followed by 0.2  $\mu$ g/ml colchicine for 3 hours. Sister chromatid exchange assays were performed as previously described [94].

**Statistical analysis:** In human tissue samples, the normality of the distribution of MLL3/KMT2C expression in bladder tissue specimens was evaluated by Shapiro-Wilk test. The non-parametric Wilcoxon signed-rank test was used to analyze MLL3/KMT2C expression between bladder tumor specimens and matched adjacent normal tissues. Animals were randomly assigned into different groups. Group allocation and outcome assessment was not blinded. In two group comparisons, normality of distribution was determined by D'Agostino & Pearson omnibus normality test, Shapiro-Wilk normality test (paired t-test). For non-Gaussian sample distribution or small sample size, Mann-Whitney *U* tests was employed. Sample sizes met the minimum requirements of the respective statistical test used. A value of  $P < 0.05$  was considered as significant. Animals which did not develop tumors or did not live through the end of the treatment were excluded. Mann-Whitney *U* test was also employed for statistical evaluation of chromosome number differences in karyotyping experiments, and tumor volumes in mouse xenograft experiments.

## **Author contributions**

AKI and TR conceived the study and designed all experiments. TR, DK, MA, AKo, ZK and EKo performed all experiments. AP analyzed expression array data. AS and KS provided the library of human tumor samples. KNM. and GEP. performed the IR and karyotyping experiments. MT and EKa performed and analyzed CMA experiments. AKI wrote the manuscript.

### **Conflict of interest**

The authors declare that they have no conflicts of interest.

### **ACKNOWLEDGEMENTS**

We would like to thank Dr. E. Chavdoula for providing NOD/SCID mice, Dr. M. Roubelaki for help with the cell cycle analysis, Dr. N. Paschalidis for Annexin V FACS analysis and Drs. V. Paraskevopoulou and P. Karakaidos for critically reading the manuscript. This work was supported by a Greek General Secretariat for Research and Technology “Excellence” grant (UTN\_1799), a Fondation Santé Grant in Biomedical Sciences and a Worldwide Cancer Research grant (16/1217) to AK.

### **REFERENCES**

1. Feinberg AP, Koldobskiy MA, Gondor A (2016) Epigenetic modulators, modifiers and mediators in cancer aetiology and progression. *Nat Rev Genet* **17**: 284-99
2. Ley TJ, Ding L, Walter MJ, McLellan MD, Lamprecht T, Larson DE, Kandoth C, Payton JE, Baty J, Welch J, *et al.* (2010) DNMT3A mutations in acute myeloid leukemia. *N Engl J Med* **363**: 2424-33
3. Nikoloski G, Langemeijer SM, Kuiper RP, Knops R, Massop M, Tonnissen ER, van der Heijden A, Scheele TN, Vandenberghe P, de Witte T, *et al.* (2010) Somatic mutations of the histone methyltransferase gene EZH2 in myelodysplastic syndromes. *Nat Genet* **42**: 665-7
4. Shilatifard A (2012) The COMPASS Family of Histone H3K4 Methylases: Mechanisms of Regulation in Development and Disease Pathogenesis. *Annual Review of Biochemistry* **81**: 65-95
5. Miller T, Krogan NJ, Dover J, Erdjument-Bromage H, Tempst P, Johnston M, Greenblatt JF, Shilatifard A (2001) COMPASS: A complex of proteins associated with a trithorax-related SET domain protein. *Proceedings of the National Academy of Sciences* **98**: 12902-12907
6. Ziemer-van der Poel S, McCabe NR, Gill HJ, Espinosa R, Patel Y, Harden A, Rubinelli P, Smith SD, LeBeau MM, Rowley JD (1991) Identification of a gene, MLL, that spans the breakpoint in 11q23

- translocations associated with human leukemias. *Proceedings of the National Academy of Sciences* **88**: 10735-10739
7. Cancer Genome Atlas Research N (2014) Comprehensive molecular characterization of urothelial bladder carcinoma. *Nature* **507**: 315-22
  8. Gonzalez-Perez A, Jene-Sanz A, Lopez-Bigas N (2013) The mutational landscape of chromatin regulatory factors across 4,623 tumor samples. *Genome Biology* **14**: r106
  9. Kandoth C, McLellan MD, Vandin F, Ye K, Niu B, Lu C, Xie M, Zhang Q, McMichael JF, Wyczalkowski MA, *et al.* (2013) Mutational landscape and significance across 12 major cancer types. *Nature* **502**: 333-339
  10. Rao RC, Dou Y (2015) Hijacked in cancer: the KMT2 (MLL) family of methyltransferases. *Nature Reviews Cancer* **15**: 334-346
  11. Robertson AG, Kim J, Al-Ahmadi H, Bellmunt J, Guo G, Cherniack AD, Hinoue T, Laird PW, Hoadley KA, Akbani R, *et al.* (2017) Comprehensive Molecular Characterization of Muscle-Invasive Bladder Cancer. *Cell* **171**: 540-556 e25
  12. Chen C, Liu Y, Rappaport Amy R, Kitzing T, Schultz N, Zhao Z, Shroff Aditya S, Dickins Ross A, Vakoc Christopher R, Bradner James E, *et al.* (2014) MLL3 Is a Haploinsufficient 7q Tumor Suppressor in Acute Myeloid Leukemia. *Cancer Cell* **25**: 652-665
  13. Lee J, Kim DH, Lee S, Yang QH, Lee DK, Lee SK, Roeder RG, Lee JW (2009) A tumor suppressive coactivator complex of p53 containing ASC-2 and histone H3-lysine-4 methyltransferase MLL3 or its paralogue MLL4. *Proceedings of the National Academy of Sciences* **106**: 8513-8518
  14. Kaikkonen MU, Spann NJ, Heinz S, Romanoski CE, Allison KA, Stender JD, Chun HB, Tough DF, Prinjha RK, Benner C, *et al.* (2013) Remodeling of the enhancer landscape during macrophage activation is coupled to enhancer transcription. *Mol Cell* **51**: 310-25
  15. Wang C, Lee JE, Lai B, Macfarlan TS, Xu S, Zhuang L, Liu C, Peng W, Ge K (2016) Enhancer priming by H3K4 methyltransferase MLL4 controls cell fate transition. *Proc Natl Acad Sci U S A* **113**: 11871-11876
  16. Dorigi KM, Swigut T, Henriques T, Bhanu NV, Scruggs BS, Nady N, Still CD, 2nd, Garcia BA, Adelman K, Wysocka J (2017) Mll3 and Mll4 Facilitate Enhancer RNA Synthesis and Transcription from Promoters Independently of H3K4 Monomethylation. *Mol Cell* **66**: 568-576 e4
  17. Rickels R, Herz HM, Sze CC, Cao K, Morgan MA, Collings CK, Gause M, Takahashi YH, Wang L, Rendleman EJ, *et al.* (2017) Histone H3K4 monomethylation catalyzed by Trr and mammalian COMPASS-like proteins at enhancers is dispensable for development and viability. *Nat Genet* **49**: 1647-1653
  18. Ferlay J, Soerjomataram I, Dikshit R, Eser S, Mathers C, Rebelo M, Parkin DM, Forman D, Bray F (2015) Cancer incidence and mortality worldwide: sources, methods and major patterns in GLOBOCAN 2012. *Int J Cancer* **136**: E359-86
  19. Sanli O, Dobruch J, Knowles MA, Burger M, Alemozaffar M, Nielsen ME, Lotan Y (2017) Bladder cancer. *Nat Rev Dis Primers* **3**: 17022
  20. Hurst CD, Alder O, Platt FM, Droop A, Stead LF, Burns JE, Burghel GJ, Jain S, Klimczak LJ, Lindsay H, *et al.* (2017) Genomic Subtypes of Non-invasive Bladder Cancer with Distinct Metabolic Profile and Female Gender Bias in KDM6A Mutation Frequency. *Cancer Cell* **32**: 701-715 e7
  21. Ali M, Hom RA, Blakeslee W, Ikenouye L, Kutateladze TG (2014) Diverse functions of PHD fingers of the MLL/KMT2 subfamily. *Biochimica et Biophysica Acta (BBA) - Molecular Cell Research* **1843**: 366-371
  22. Rampias T, Vgenopoulou P, Avgeris M, Polyzos A, Stravodimos K, Valavanis C, Scorilas A, Klinakis A (2014) A new tumor suppressor role for the Notch pathway in bladder cancer. *Nature Medicine* **20**: 1199-1205
  23. Cancer Genome Atlas N (2012) Comprehensive molecular characterization of human colon and rectal cancer. *Nature* **487**: 330-7
  24. Cancer Genome Atlas Research N (2012) Comprehensive genomic characterization of squamous cell lung cancers. *Nature* **489**: 519-25

25. Cancer Genome Atlas N (2015) Comprehensive genomic characterization of head and neck squamous cell carcinomas. *Nature* **517**: 576-82
26. Cancer Genome Atlas Research N (2014) Comprehensive molecular profiling of lung adenocarcinoma. *Nature* **511**: 543-50
27. Rabello DDA, Ferreira V, Berzoti-Coelho MG, Burin SM, Magro CL, Cacemiro MDC, Simoes BP, Saldanha-Araujo F, de Castro FA, Pittella-Silva F (2018) MLL2/KMT2D and MLL3/KMT2C expression correlates with disease progression and response to imatinib mesylate in chronic myeloid leukemia. *Cancer Cell Int* **18**: 26
28. Tang Z, Li C, Kang B, Gao G, Li C, Zhang Z (2017) GEPIA: a web server for cancer and normal gene expression profiling and interactive analyses. *Nucleic Acids Res* **45**: W98-W102
29. Huang WY, Hsu SD, Huang HY, Sun YM, Chou CH, Weng SL, Huang HD (2014) MethHC: a database of DNA methylation and gene expression in human cancer. *Nucleic Acids Research* **43**: D856-D861
30. Ibragimova I, Dulaimi E, Slifker MJ, Chen DDY, Uzzo RG, Cairns P (2014) A global profile of gene promoter methylation in treatment-naïve urothelial cancer. *Epigenetics* **9**: 760-773
31. Hanahan D, Weinberg Robert A (2011) Hallmarks of Cancer: The Next Generation. *Cell* **144**: 646-674
32. Rada-Iglesias A, Bajpai R, Swigut T, Brugmann SA, Flynn RA, Wysocka J (2011) A unique chromatin signature uncovers early developmental enhancers in humans. *Nature* **470**: 279-83
33. Wu G, Guo Z, Chang X, Kim MS, Nagpal JK, Liu J, Maki JM, Kivirikko KI, Ethier SP, Trink B, *et al.* (2007) LOXL1 and LOXL4 are epigenetically silenced and can inhibit ras/extracellular signal-regulated kinase signaling pathway in human bladder cancer. *Cancer Res* **67**: 4123-9
34. Lin-Shiao E, Lan Y, Coradin M, Anderson A, Donahue G, Simpson CL, Sen P, Saffie R, Busino L, Garcia BA, *et al.* (2018) KMT2D regulates p63 target enhancers to coordinate epithelial homeostasis. *Genes Dev* **32**: 181-193
35. Boros J, Donaldson IJ, O'Donnell A, Odrowaz ZA, Zeef L, Lupien M, Meyer CA, Liu XS, Brown M, Sharrocks AD (2009) Elucidation of the ELK1 target gene network reveals a role in the coordinate regulation of core components of the gene regulation machinery. *Genome Res* **19**: 1963-73
36. Dhar SS, Zhao D, Lin T, Gu B, Pal K, Wu SJ, Alam H, Lv J, Yun K, Gopalakrishnan V, *et al.* (2018) MLL4 Is Required to Maintain Broad H3K4me3 Peaks and Super-Enhancers at Tumor Suppressor Genes. *Mol Cell* **70**: 825-841 e6
37. Yan J, Chen SA, Local A, Liu T, Qiu Y, Dorigi KM, Preissl S, Rivera CM, Wang C, Ye Z, *et al.* (2018) Histone H3 lysine 4 monomethylation modulates long-range chromatin interactions at enhancers. *Cell Res* **28**: 204-220
38. Wang L, Zhao Z, Ozark PA, Fantini D, Marshall SA, Rendleman EJ, Cozzolino KA, Louis N, He X, Morgan MA, *et al.* (2018) Resetting the epigenetic balance of Polycomb and COMPASS function at enhancers for cancer therapy. *Nat Med* **24**: 758-769
39. Chae YK, Anker JF, Carneiro BA, Chandra S, Kaplan J, Kalyan A, Santa-Maria CA, Platanias LC, Giles FJ (2016) Genomic landscape of DNA repair genes in cancer. *Oncotarget* **7**: 23312-21
40. Bernstein C, Bernstein H (2015) Epigenetic reduction of DNA repair in progression to gastrointestinal cancer. *World J Gastrointest Oncol* **7**: 30-46
41. Lahtz C, Pfeifer GP (2011) Epigenetic changes of DNA repair genes in cancer. *J Mol Cell Biol* **3**: 51-8
42. Aze A, Zhou JC, Costa A, Costanzo V (2013) DNA replication and homologous recombination factors: acting together to maintain genome stability. *Chromosoma* **122**: 401-13
43. Carr AM, Lambert S (2013) Replication stress-induced genome instability: the dark side of replication maintenance by homologous recombination. *J Mol Biol* **425**: 4733-44
44. Hashimoto Y, Ray Chaudhuri A, Lopes M, Costanzo V (2010) Rad51 protects nascent DNA from Mre11-dependent degradation and promotes continuous DNA synthesis. *Nat Struct Mol Biol* **17**: 1305-11

45. Lambert S, Mizuno K, Blaisonneau J, Martineau S, Chanet R, Freon K, Murray JM, Carr AM, Baldacci G (2010) Homologous recombination restarts blocked replication forks at the expense of genome rearrangements by template exchange. *Mol Cell* **39**: 346-59
46. Schlacher K, Christ N, Siaud N, Egashira A, Wu H, Jasin M (2011) Double-strand break repair-independent role for BRCA2 in blocking stalled replication fork degradation by MRE11. *Cell* **145**: 529-42
47. Berti M, Vindigni A (2016) Replication stress: getting back on track. *Nat Struct Mol Biol* **23**: 103-9
48. Halazonetis TD, Gorgoulis VG, Bartek J (2008) An oncogene-induced DNA damage model for cancer development. *Science* **319**: 1352-5
49. Macheret M, Halazonetis TD (2018) Intragenic origins due to short G1 phases underlie oncogene-induced DNA replication stress. *Nature* **555**: 112-116
50. Ait Saada A, Teixeira-Silva A, Iraqui I, Costes A, Hardy J, Paoletti G, Freon K, Lambert SAE (2017) Unprotected Replication Forks Are Converted into Mitotic Sister Chromatid Bridges. *Mol Cell* **66**: 398-410 e4
51. Takata M, Sasaki MS, Tachiiri S, Fukushima T, Sonoda E, Schild D, Thompson LH, Takeda S (2001) Chromosome instability and defective recombinational repair in knockout mutants of the five Rad51 paralogs. *Mol Cell Biol* **21**: 2858-66
52. Bunting SF, Callén E, Wong N, Chen H-T, Polato F, Gunn A, Bothmer A, Feldhahn N, Fernandez-Capetillo O, Cao L, *et al.* (2010) 53BP1 Inhibits Homologous Recombination in Brca1-Deficient Cells by Blocking Resection of DNA Breaks. *Cell* **141**: 243-254
53. Wilson TE, Grawunder U, Lieber MR (1997) Yeast DNA ligase IV mediates non-homologous DNA end joining. *Nature* **388**: 495-8
54. Mansour WY, Rhein T, Dahm-Daphi J (2010) The alternative end-joining pathway for repair of DNA double-strand breaks requires PARP1 but is not dependent upon microhomologies. *Nucleic Acids Research* **38**: 6065-6077
55. Wang M, Wu W, Wu W, Rosidi B, Zhang L, Wang H, Iliakis G (2006) PARP-1 and Ku compete for repair of DNA double strand breaks by distinct NHEJ pathways. *Nucleic Acids Research* **34**: 6170-6182
56. Srivastava M, Nambiar M, Sharma S, Karki Subhas S, Goldsmith G, Hegde M, Kumar S, Pandey M, Singh Ram K, Ray P, *et al.* (2012) An Inhibitor of Nonhomologous End-Joining Abrogates Double-Strand Break Repair and Impedes Cancer Progression. *Cell* **151**: 1474-1487
57. Menear KA, Adcock C, Boulter R, Cockcroft X-I, Copsey L, Cranston A, Dillon KJ, Drzewiecki J, Garman S, Gomez S, *et al.* (2008) 4-[3-(4-Cyclopropanecarbonylpiperazine-1-carbonyl)-4-fluorobenzyl]-2H-phthalazin-1-one: A Novel Bioavailable Inhibitor of Poly(ADP-ribose) Polymerase-1. *Journal of Medicinal Chemistry* **51**: 6581-6591
58. Farmer H, McCabe N, Lord CJ, Tutt ANJ, Johnson DA, Richardson TB, Santarosa M, Dillon KJ, Hickson I, Knights C, *et al.* (2005) Targeting the DNA repair defect in BRCA mutant cells as a therapeutic strategy. *Nature* **434**: 917-921
59. Patel AG, Sarkaria JN, Kaufmann SH (2011) Nonhomologous end joining drives poly(ADP-ribose) polymerase (PARP) inhibitor lethality in homologous recombination-deficient cells. *Proceedings of the National Academy of Sciences* **108**: 3406-3411
60. McCabe N (2006) Deficiency in the Repair of DNA Damage by Homologous Recombination and Sensitivity to Poly(ADP-Ribose) Polymerase Inhibition. *Cancer Research* **66**: 8109-8115
61. Mateo J, Carreira S, Sandhu S, Miranda S, Mossop H, Perez-Lopez R, Nava Rodrigues D, Robinson D, Omlin A, Tunariu N, *et al.* (2015) DNA-Repair Defects and Olaparib in Metastatic Prostate Cancer. *N Engl J Med* **373**: 1697-708
62. Yang W, Soares J, Greninger P, Edelman EJ, Lightfoot H, Forbes S, Bindal N, Beare D, Smith JA, Thompson IR, *et al.* (2013) Genomics of Drug Sensitivity in Cancer (GDSC): a resource for therapeutic biomarker discovery in cancer cells. *Nucleic Acids Res* **41**: D955-61
63. Glaser AP, Fantini D, Shilatifard A, Schaeffer EM, Meeks JJ (2017) The evolving genomic landscape of urothelial carcinoma. *Nat Rev Urol* **14**: 215-229

64. Lee J, Saha PK, Yang QH, Lee S, Park JY, Suh Y, Lee SK, Chan L, Roeder RG, Lee JW (2008) Targeted inactivation of MLL3 histone H3-Lys-4 methyltransferase activity in the mouse reveals vital roles for MLL3 in adipogenesis. *Proc Natl Acad Sci U S A* **105**: 19229-34
65. Sedkov Y, Benes JJ, Berger JR, Riker KM, Tillib S, Jones RS, Mazo A (1999) Molecular genetic analysis of the Drosophila trithorax-related gene which encodes a novel SET domain protein. *Mech Dev* **82**: 171-9
66. Jamal-Hanjani M, Wilson GA, McGranahan N, Birkbak NJ, Watkins TBK, Veeriah S, Shafi S, Johnson DH, Mitter R, Rosenthal R, *et al.* (2017) Tracking the Evolution of Non-Small-Cell Lung Cancer. *N Engl J Med* **376**: 2109-2121
67. Anjanappa M, Hao Y, Simpson ER, Bhat-Nakshatri P, Nelson JB, Tersey SA, Mirmira RG, Cohen-Gadol AA, Saadatzaheh MR, Li L, *et al.* (2018) A system for detecting high impact-low frequency mutations in primary tumors and metastases. *Oncogene* **37**: 185-196
68. Herz HM, Mohan M, Garruss AS, Liang K, Takahashi YH, Mickey K, Voets O, Verrijzer CP, Shilatifard A (2012) Enhancer-associated H3K4 monomethylation by Trithorax-related, the Drosophila homolog of mammalian Mll3/Mll4. *Genes Dev* **26**: 2604-20
69. Hu D, Gao X, Morgan MA, Herz HM, Smith ER, Shilatifard A (2013) The MLL3/MLL4 branches of the COMPASS family function as major histone H3K4 monomethylases at enhancers. *Mol Cell Biol* **33**: 4745-54
70. Sur I, Taipale J (2016) The role of enhancers in cancer. *Nat Rev Cancer* **16**: 483-93
71. Gonda TJ, Ramsay RG (2015) Directly targeting transcriptional dysregulation in cancer. *Nat Rev Cancer* **15**: 686-94
72. Herz HM (2016) Enhancer deregulation in cancer and other diseases. *Bioessays* **38**: 1003-15
73. Herz HM, Hu D, Shilatifard A (2014) Enhancer malfunction in cancer. *Mol Cell* **53**: 859-66
74. Denissov S, Hofemeister H, Marks H, Kranz A, Ciotta G, Singh S, Anastassiadis K, Stunnenberg HG, Stewart AF (2014) Mll2 is required for H3K4 trimethylation on bivalent promoters in embryonic stem cells, whereas Mll1 is redundant. *Development* **141**: 526-37
75. Hu D, Gao X, Cao K, Morgan MA, Mas G, Smith ER, Volk AG, Bartom ET, Crispino JD, Di Croce L, *et al.* (2017) Not All H3K4 Methylations Are Created Equal: Mll2/COMPASS Dependency in Primordial Germ Cell Specification. *Mol Cell* **65**: 460-475 e6
76. Konstantinopoulos PA, Ceccaldi R, Shapiro GI, D'Andrea AD (2015) Homologous Recombination Deficiency: Exploiting the Fundamental Vulnerability of Ovarian Cancer. *Cancer Discov* **5**: 1137-54
77. Lord CJ, Ashworth A (2017) PARP inhibitors: Synthetic lethality in the clinic. *Science* **355**: 1152-1158
78. Weston VJ, Oldreive CE, Skowronska A, Oscier DG, Pratt G, Dyer MJ, Smith G, Powell JE, Rudzki Z, Kearns P, *et al.* (2010) The PARP inhibitor olaparib induces significant killing of ATM-deficient lymphoid tumor cells in vitro and in vivo. *Blood* **116**: 4578-87
79. Ford E, Nikopoulou C, Kokkalis A, Thanos D (2014) A method for generating highly multiplexed ChIP-seq libraries. *BMC Research Notes* **7**: 312
80. Langmead B, Salzberg SL (2012) Fast gapped-read alignment with Bowtie 2. *Nature Methods* **9**: 357-359
81. Li H, Handsaker B, Wysoker A, Fennell T, Ruan J, Homer N, Marth G, Abecasis G, Durbin R (2009) The Sequence Alignment/Map format and SAMtools. *Bioinformatics* **25**: 2078-2079
82. Zhang Y, Liu T, Meyer CA, Eeckhoute J, Johnson DS, Bernstein BE, Nussbaum C, Myers RM, Brown M, Li W, *et al.* (2008) Model-based Analysis of ChIP-Seq (MACS). *Genome Biology* **9**: R137
83. Quinlan AR, Hall IM (2010) BEDTools: a flexible suite of utilities for comparing genomic features. *Bioinformatics* **26**: 841-842
84. Ye T, Krebs AR, Choukrallah M-A, Keime C, Plewniak F, Davidson I, Tora L (2010) seqMINER: an integrated ChIP-seq data interpretation platform. *Nucleic Acids Research* **39**: e35-e35
85. Kim D, Pertea G, Trapnell C, Pimentel H, Kelley R, Salzberg SL (2013) TopHat2: accurate alignment of transcriptomes in the presence of insertions, deletions and gene fusions. *Genome Biology* **14**: R36



86. Anders S, Pyl PT, Huber W (2014) HTSeq - A Python framework to work with high-throughput sequencing data. In Cold Spring Harbor Laboratory Press
87. Anders S, Huber W (2010) Differential expression analysis for sequence count data. *Genome Biology* **11**: R106
88. Huang DW, Sherman BT, Lempicki RA (2008) Systematic and integrative analysis of large gene lists using DAVID bioinformatics resources. *Nature Protocols* **4**: 44-57
89. Livak KJ, Schmittgen TD (2001) Analysis of Relative Gene Expression Data Using Real-Time Quantitative PCR and the 2- $\Delta\Delta$ CT Method. *Methods* **25**: 402-408
90. Papafotiou G, Paraskevopoulou V, Vasilaki E, Kanaki Z, Paschalidis N, Klinakis A (2016) KRT14 marks a subpopulation of bladder basal cells with pivotal role in regeneration and tumorigenesis. *Nat Commun* **7**: 11914
91. Pantelias GE (1986) Radiation-Induced Cytogenetic Damage in Relation to Changes in Interphase Chromosome Conformation. *Radiation Research* **105**: 341
92. Schorl C, Sedivy JM (2007) Analysis of cell cycle phases and progression in cultured mammalian cells. *Methods* **41**: 143-150
93. Nieminuszczy J, Schwab RA, Niedzwiedz W (2016) The DNA fibre technique - tracking helicases at work. *Methods* **108**: 92-8
94. Bayani J, Squire JA (2005) *Sister Chromatid Exchange*. In Current Protocols in Cell Biology, John Wiley & Sons, Inc.
95. Adzhubei IA, Schmidt S, Peshkin L, Ramensky VE, Gerasimova A, Bork P, Kondrashov AS, Sunyaev SR (2010) A method and server for predicting damaging missense mutations. *Nat Methods* **7**: 248-9

## Figure legends

### Figure 1. *KMT2C* downregulation in cancer tissue.

(A) *KMT2C* mutations identified in our study cohort of human bladder cancers. Mutations in red are predicted to be damaging while those in black benign, according to the PolyPHEN-2 algorithm (D and B, respectively in Table EV1) [95].

(B) Comparison of *KMT2C* expression in cancer/healthy matched tissue pairs (n=104) of the study cohort. Expression is presented as log(ratio tumor/healthy) in the Y axis. Data obtained from qRT-PCR analysis. *P* value calculated by Wilcoxon signed-rank test.

(C) Immunofluorescence (top) and Western blot analysis (bottom) against *KMT2C* on representative human bladder cancers with variable *KMT2C* transcript levels: 11<sup>th</sup>, 4<sup>th</sup>, 93<sup>rd</sup> and 79<sup>th</sup> percentile for UCC30, 6, 7 and 29, respectively (Appendix Table S2), from the differential expression analysis of the study cohort. Antibodies against KRT5 or KRT20 were used to stain urothelial cells and DAPI as nuclear counterstain.  $\beta$ -actin is used as loading control in Western blots. Scale bars indicate 50  $\mu$ m.

(D) Comparison of *KMT2C* expression in human healthy and cancer tissue from bladder cancer (BC, n=136), colorectal adenocarcinoma (COAD, n=128), non-small cell lung cancer (NSCLC, n=341), and head and neck squamous cell carcinoma (HNSCC, n=174) patients. For NSCLC analysis, separate cohorts from adenocarcinoma and squamous cell carcinoma were combined. Separate analysis of the two NSCLC subtypes (adenocarcinoma and squamous cell carcinoma) yielded the same results. For COAD, the Y axis is the log<sub>2</sub>(ratio tumor/normal) of *KMT2C* expression as assessed with Affymetrix microarray. All expression data were obtained from TCGA through cbiportal.org. *P* values calculated by Mann-Whitney U test. The middle lines inside the boxes indicate the median (50th percentile). The lower and the upper box boundaries represent the 25th percentile and the 75th percentile, respectively. The lower and upper whiskers extend to the lowest and highest value, respectively, within the 1.5 $\times$  interquartile range (box height) from the box boundaries.

### Figure 2. *KMT2C* loss leads to extensive epigenetic changes in human bladder cancer cells.

(A) *KMT2C* transcript (left) and protein (right) levels in human bladder cancer cell lines stably transduced with lentiviral vectors expressing shRNAs against *KMT2C* (KD1 and KD2) in comparison to Scr control cells expressing scrambled shRNAs (Scr). RBBP5,

another COMPASS complex protein used as internal control and b-actin as loading control. Transcript levels were assessed by qRT-PCR in triplicates and values shown represent mean $\pm$ SEM.

(B) Bar graph showing selected biological processes and signaling pathways obtained from Gene Ontology (GO) enrichment analysis for the 3324 differentially expressed genes between Scr control and KMT2C/KD1 HTB9 cells. Expression values were obtained from RNA-seq data.

(C) Quantitative RT-PCR for *KMT2C* in HTB9/KD1 cells, and HTB9/KD1 cells stably transfected with a plasmid expressing a Flag-tagged full length KMT2C protein (fKMT2C). Expression levels are shown in the Y axis as respective ratios over *KMT2C* expression in Scr control cells (Scr expression corresponds to 1). Experiments were performed in triplicates and analyzed with Mann Whitney U test. Values shown represent mean $\pm$ SEM. \* designates *P* value<0.05.

(D) Genome distribution of KMT2C peaks in HTB9/KD1 cells complemented with fKMT2C. Data obtained from ChIP-seq experiments.

(E) Density plot indicating KMT2C binding and H3K27ac levels on active enhancers in Scr control and KD1 HTB9 cells.

(F) Bar graph showing selected biological processes and signaling pathways obtained from Gene Ontology (GO) enrichment analysis for 253 genes in proximity to active enhancers affected by *KMT2C* knockdown and heatmap of their expression (>1.5-fold H3K27ac and mRNA downregulation). Data obtained from ChIP-seq and RNA-seq experiments.

(G) Bedgraph indicating KMT2C binding and H3K27ac at a putative enhancer of the *ITGB1* locus before and after KMT2C knockdown in HTB9 cells.

(H) Transcription factor binding motif analysis on active enhancers affected by *KMT2C* knockdown. Data obtained from ChIP-seq experiments.

**Figure 3. KMT2C controls the expression of DDR and DNA repair genes in BC cells.**

(A) Density plot indicating KMT2C binding and H3K4me3, H3K27ac and H3K9ac levels on transcription start sites (TSS) in HTB9 cells.

(B) Histogram indicating distribution of histone modifications around transcription start sites (TSS  $\pm$  5000 bp). Data obtained from ChIP-seq with antibodies against the indicated histone modifications.

(C) Transcription factor binding motif analysis on TSS of genes transcriptionally affected by *KMT2C* knockdown. Data obtained from ChIP-seq experiments.

(D) Boxplot indicating expression (left) and H3K4me3 levels (right) of genes with *KMT2C* presence on their promoters in Scr control and *KMT2C*/KD1 cells. Median comparison of Expr/K4m3 values was performed with two-tailed paired Wilcoxon rank sum test with continuity correction. The middle lines inside the boxes indicate the median (50th percentile). The lower and the upper box boundaries represent the 25th percentile and the 75th percentile, respectively. The lower and upper whiskers extend to the lowest and highest value, respectively, within the  $1.5\times$  interquartile range (box height) from the box boundaries.

(E) Heatmap comparison of the expression levels of genes implicated in DDR between control (Scr) and *KMT2C* knockdown (KD1) HTB9 cells (left). Expression data were obtained from RNA-seq experiments. Western blot analysis of selected proteins in control (Scr) and *KMT2C* knockdown (KD1 and KD2) HTB9 cells (right).

(F) Expression level restoration of selected genes in *KMT2C*/KD1 HTB9 cells complemented with exogenously expressed flag-tagged *KMT2C* (f*KMT2C*). Data obtained by qRT-PCR. Experiments were performed in triplicates and values shown represent mean $\pm$ SEM.

**Figure 4. *KMT2C* controls the expression of DDR and DNA repair genes in various cancers.**

(A) Bedgraphs indicating *KMT2C* and H3K4me3 binding at the TSS of indicated loci in HTB9 cells; also, from published studies available at the ENCODE, the binding of the COMPASS complex member RBBP5 and the transcription factor ELK1 is indicated in the same loci.

(B) *KMT2C* expression (Y axis) in various human cell lines (X axis). Cell lines under study are indicated as red geometrical schemes. Data were obtained directly from the Broad Institute CCLE server.

(C) Expression levels of indicated genes in indicated cell lines upon *KMT2C* knockdown. Expression is shown as log(KD1/Scr) in the Y axis. Remaining *KMT2C* transcript levels for all knockdown experiments can be found in Table EV2. Note that H1792 which show poor KD1 (~25%) also show no change in ATM, ATR, BRCA1 and BRCA2 expression (light red bar appearing last in each set). Experiments were performed in triplicates. In plots, bars represent mean $\pm$ SEM.

(D) Correlation in expression levels between *KMT2C* and indicated genes in our study cohort of superficial and muscle-invasive BC. Data obtained from qRT-PCR. Experiments were performed in duplicates. *P* values were calculated by Mann-Whitney U test.

(E) Correlation in expression levels between *KMT2C* and indicated genes in BC, COAD, NSCLC and HNSCC tumors. RNA-Seq data were obtained from the TCGA through cbiportal.org. Mann-Whitney U test was used. \*\*\* designates  $P$  value $<0.001$  and \*\*\*\* designates  $P$  value $<0.0001$ .

### Figure 5. Cells lacking *KMT2C* are HR-deficient

(A) Immunofluorescence of  $\gamma$ H2AX foci (left) and quantitation (right) in control (Scr) and *KMT2C* knockdown (*KMT2C*/KD1 and KD2) HTB9 cells. *BRCA1* knockdown (*BRCA1*/KD) is used as control. The Y axis indicates added percentage of cells with 1-5 and  $>5$  foci for each cell type. Scale bars indicate 5  $\mu$ m. All comparisons have been performed against Scr control cells. Values in the bargraph represent mean $\pm$ SEM from 3 experiments. Student's t-test was used. \* designates  $P$  value $<0.05$  and \*\* designates  $P$  value $<0.01$ .

(B) Frequency of RAD51 foci in cisplatin-treated HTB9 control (Scr) and *KMT2C* knockdown (KD1) cells. The Y axis indicates added percentage of cells with 1-3 and 3 foci. Scale bars indicate 10  $\mu$ m. Values in the bargraph represent mean $\pm$ SEM from 3 experiments. Student's t-test was used. \* designates  $P$  value $<0.05$  and \*\* designates  $P$  value $<0.01$ .

(C) Sister chromatid exchange (SCE) assay with cisplatin-treated HTB9 control (Scr) and *KMT2C* knockdown (KD1) cells. Red arrowheads indicate sister chromatid exchange events. Results were obtained from 15 metaphases per group. Mann-Whitney U test was used.

(D) DNA fiber assay on control (Scr) and *KMT2C* knockdown (KD1) HTB9 cells. *BRCA1* knockdown cells are used as controls. Experiments performed with or without hydroxyurea (HU) treatment under the conditions indicated in the schematic. Examples of DNA fibers from HTB9/KD1 cells are shown. The length of minimum 100 fibers from each condition was measured. Values in the plot are means  $\pm$  SEM. Mann-Whitney U test was used. \*\* designates  $P$  value $<0.01$ .

### Figure 6. *KMT2C* loss leads to genomic instability

(A) Representative image (from HTB9/KD1 cells) and frequency of both HTB9 and T24 control (Scr) and *KMT2C*/KD1 cells with micronuclei. Scale bar indicates 5  $\mu$ m. Values represent mean $\pm$ SEM from 3 experiments. Student's t-test was used. \*\* designates  $P$  value $<0.01$  and \*\*\*\* designates  $P$  value $<0.0001$ .

(B) Representative images (from HTB9 cells) and frequency of abnormal metaphases presenting lagging chromosomes, chromosome bridges and chromosome congression in HTB9 and T24 control (Scr) and *KMT2C*/KD1 cells. Scale bar indicates 5  $\mu$ m. Values represent mean $\pm$ SEM from 3 experiments. Student's t-test was used. \*\* designates P value<0.01 and \*\*\* P value<0.001.

(C) Karyotypic analysis and chromosomal count in control (Scr) and *KMT2C*/KD1 and KD2 cells. All comparisons performed against Scr control cells. Metaphases studied: HTB9 Scr, n=20; HTB9 KD1, n=11; HTB9 KD2, n=12; T24 Scr, n=20; T24 KD1, n=15; T24 KD2, n=12. Mann-Whitney U test was used. \*\*\*\* designates P value<0.0001

(D) Average chromosome count ration KD/Scr obtained from Giemsa-stained metaphase spreads of HTB9 and T24 KD1 and KD2 cells. Number of metaphases studied: HTB9 Scr, n=20; HTB9 KD1, n=11; HTB9 KD2, n=12; T24 Scr, n=20; T24 KD1, n=15; T24 KD2, n=12. Mann-Whitney U test was used. \* designates P value <0.05, \*\* P value <0.01 and \*\*\* P value <0.001.

(E) Fragment size of gains and losses obtained from CMA analysis on HTB9/KD1 and KD2 cells. Mann-Whitney U test was used. One sample from each cell type was used in CMA analysis.

(F) Copy number gains and losses of HTB9 KD1 and KD2 cells in comparison to HTB9/Scr controls. Data obtained from CMA. Values as presented as log(KD1/Scr) in the Y axis. The horizontal red line indicates log value 0, which corresponds to no change. Note that for the majority of chromosomes there are losses in the KD1 cells.

### **Figure 7. *KMT2C* loss leads to PARP1/2 dependence for DNA repair**

(A) Frequency of TP53BP1 foci in cisplatin-treated HTB9 control (Scr) and *KMT2C* knockdown (KD1) cells. Size bars in microscopy panels correspond to 5  $\mu$ m. In the plot, bars represent mean  $\pm$ SEM from n=3 experiments.

(B) Frequency of chromosome fusions obtained from IR-treated (schematic) HTB9 control (Scr) and *KMT2C* knockdown (KD1) cells. Representative karyotypes are shown. Size bars in karyotype panels correspond to 10  $\mu$ m. White arrows indicate chromosome fusion events. In the plot, bars represent mean  $\pm$ SEM from n=3 experiments.

(C) Frequency of chromosome fusions in IR-treated HTB9 control (Scr) and *KMT2C* knockdown (KD1) cells upon treatment with SCR7 (30 $\mu$ M) and Olaparib (15  $\mu$ M). Bars represent mean  $\pm$ SEM from n=3 experiments. \*\*\* designates P value<0.001.

(D) Frequency of radial chromosomes in IR-treated HTB9 control (Scr) and *KMT2C* knockdown (KD1) cells upon treatment with SCR7 (30  $\mu$ M), Olaparib (15  $\mu$ M) or both. Representative karyotypes are shown. Size bars in karyotype panels correspond to 10  $\mu$ m. White arrows indicate radial structures. In the plot, bars represent mean  $\pm$ SEM from n=3 experiments. \* designates P value<0.05 and \*\*\* P value<0.001.

Throughout the figure, Mann Whitney U test was used.

**Figure 8. *KMT2C* loss leads to PARP1/2 dependence *in vitro* and *in vivo***

(A) MTT assays on untreated control (Scr) and *KMT2C*/KD cells. BRCA1/KD cells are used as controls. Values represent mean $\pm$ SEM from 3 experiments.

(B) MTT assays with IR-treated control (Scr) and *KMT2C*/KD1 cells treated with 15  $\mu$ M Olaparib. Values represent mean $\pm$ SEM from 3 experiments.

(C) Boxplot indicating Olaparib IC50 of BLCA, HNSCC, COAD and NSCLC cell lines from publically available data (<https://www.cancerrxgene.org/>). *KMT2C* high and low indicates that *KMT2C* expression of the cell line is at the top or bottom 50% of the cohort respectively (data obtained from cbiportal.org; Cancer Cell Line Encyclopedia). Mann Whitney U test was used.

(D) Tumor volume obtained from xenografts of control and *KMT2C*/KD1 cells treated with vehicle or Olaparib. The number of mice analyzed for each cohort and raw measurements are provided in Appendix Table S3. The following tumor weight averages (in grams) were obtained  $\pm$  S.E.M. for vehicle and Olaparib, respectively: HTB9/Scr, 0.791 $\pm$ 0.155 and 0.468 $\pm$ 0.097; HTB9/KD1, 0.862 $\pm$ 0.156 and 0.072 $\pm$ 0.023; T84/Scr, 1.032 $\pm$ 0.217 and 0.413 $\pm$ 0.097; T84/KD1, 0.562 $\pm$ 0.159 and 0.105 $\pm$ 0.032; H1437/Scr, 0.661 $\pm$ 0.133 and 0.780 $\pm$ 0.133; H1437/KD1, 0.723 $\pm$ 0.099 and 0.363 $\pm$ 0.108; Cal-33/Scr, 0.439 $\pm$ 0.051 and 0.301 $\pm$ 0.029; Cal-33/KD1, 0.584 $\pm$ 0.224 and 0.05 $\pm$ 0.016. Statistically significant pairwise comparison with respective vehicle for each day is indicated with star. Mann Whitney U test was used. \* designates P value<0.05. All statistical values including those between Scr and KD1 cells are provided in Appendix Table S4.

(E) Immunohistochemistry with the indicated antibodies on tumor sections from control (Scr) and *KMT2C*/KD1 HTB9 cells grown subcutaneously in NOD/SCID mice which were treated with vehicle or Olaparib. Statistically significant pairwise comparison with respective vehicle is indicated with stars on top of each column. All other statistically significant comparisons are indicated with squared brackets connecting pairs under comparison. In microscopy images, scale bars indicate 50 $\mu$ m. In bargraphs, values

correspond to mean $\pm$ SEM from n=3 experiments. Student's t-test was used for the analysis.

\* designates P value<0.05.



## Expanded View

### Expanded View Figure legends

#### Figure EV1. *KMT2C* promoter methylation in human cancers.

(A) Schematic of the upstream promoter region of the *KMT2C* locus indicating the position and sequence of methylation detection probes within the CpG island (located at chr7:152435133-152437025, assembly GRCh38/hg38) that encompasses the *KMT2C* promoter region.

(B) Comparison of the methylation levels of the above probes in tumor samples and normal bladder tissue. Methylation data were obtained from TCGA through the MethHC database for n=21 healthy/tumor pairs. Wilcoxon matched-pairs signed rank test was used.

(C) Tumor vs. normal paired comparison of the methylation levels in the *KMT2C* promoter in various cancer types; cg1: cg17322443; cg2: cg19258062. Methylation data were obtained from the MethHC database (Huang et al., 2014). BC: n=21, COAD: n=21, NSCLC: n=70, HNSCC: n=50. For NSCLC analysis, separate cohorts from adenocarcinoma and squamous cell carcinoma were combined. Separate analysis of the two NSCLC subtypes yielded the same results. Wilcoxon matched-pairs signed rank test was used. \* designates P value<0.05 and \*\*\*\* P value<0.0001.

#### Figure EV2. Cells lacking *KMT2C* are HR-deficient

(A) Immunofluorescence of  $\gamma$ H2AX foci and quantitation in control (Scr) and *KMT2C* knockdown (*KMT2C*/KD1 and KD2) T24 cells. *BRCA1* knockdown (*BRCA1*/KD) is used as control. Scale bars indicate 10  $\mu$ m. Values in the plot correspond to mean $\pm$ SEM. Data from 3 experiments were analyzed with student's t-test. \* designates P value<0.05 and \*\* designates P value<0.01. Remaining protein levels of *BRCA1* are also shown for both HTB9 (referring to Figure 5A) and T24 are also shown.

(B) Frequency of RAD51 foci in cisplatin-treated T24 control (Scr) and *KMT2C* knockdown (KD1) cells. Scale bars indicate 10  $\mu$ m. Values in the plot correspond to mean $\pm$ SEM. Data from 3 experiments were analyzed with student's t-test. \* designates P value<0.05 and \*\* designates P value<0.01.

(C) Sister chromatid exchange assay with cisplatin-treated T24 control (Scr) and *KMT2C* knockdown (KD1) cells. Results were obtained from 15 metaphases per group. White arrowheads indicate sister chromatid exchange events.

(D) DNA fiber assay on control (Scr) and *KMT2C* knockdown (KD1) T24 cells. *BRCA1* knockdown cells are used as controls. Experiments performed with or without hydroxyurea (HU) treatment under the conditions indicated in Figure 5D. The length of minimum 100 fibers from each condition was measured. Red horizontal lines indicate the median tract length in each group.

**Figure EV3. *KMT2C* loss leads to PARP1/2 dependence for DNA repair.**

(A) Frequency of TP53BP1 foci in cisplatin-treated T24 control (Scr) and *KMT2C* knockdown (KD1) cells. Size bars in microscopy panels correspond to 10  $\mu$ m. In the plot, bars represent mean  $\pm$ SEM from n=3 experiments.

(B) Frequency of chromosome fusions obtained from IR-treated (schematic) T24 control (Scr) and *KMT2C* knockdown (KD1) cells. Representative karyotypes are shown. Size bars in karyotype panels correspond to 5  $\mu$ m. White arrows indicate chromosome chromosome fusions. In the plot, bars represent mean  $\pm$ SEM from n=3 experiments.

(C) Frequency of chromosome fusions in IR-treated T24 control (Scr) and *KMT2C* knockdown (KD1) cells upon treatment with SCR7 and Olaparib. Bars represent mean  $\pm$ SEM from n=3 experiments. Throughout the figure, Mann Whitney U test was used.

**Figure EV4. *KMT2C* loss leads to PARP1/2 dependence for DNA repair.**

A, B Frequency of radial structures in IR-treated HTB9/KD1 (A) and T24/KD1 (B) cells upon Ligase III and IV knockdown (top left), and western blot analysis indicating respective leftover protein levels (top right). Representative karyotypes are shown. Values in the plot indicate mean $\pm$ SEM. Analysis of 3 experiments was performed using student's t-test. \* designates *P* value <0.05 and \*\*\* *P* value <0.001.

**Figure EV5. *In vitro* clonogenic assays indicating PARPi sensitivity of *KMT2C*/KD cells.**

Representative photographs (left) and number of colonies (Y axis) generated by HTB9 and T24 (Scr and *KMT2C*/KD1) cells treated with increasing concentrations of Olaparib (X axis). Cells were seeded and grown for 20 days at which point the experiment was concluded and dishes were photographed. Values in the plot indicate mean number of colonies $\pm$ SEM. Analysis of 3 experiments was performed using student's t-test. \* designates *P* value<0.05, \*\* designates *P* value<0.01 and \*\*\* designates *P* value <0.001.

**YOU MUST COMPLETE ALL CELLS WITH A PINK BACKGROUND ↓**

PLEASE NOTE THAT THIS CHECKLIST WILL BE PUBLISHED ALONGSIDE YOUR PAPER

Corresponding Author Name: Jeff Schorey

Journal Submitted to: EMBO Reports

Manuscript Number: EBMOR-2018-46613

### Reporting Checklist for Life Sciences Articles (Rev. June 2017)

This checklist is used to ensure good reporting standards and to improve the reproducibility of published results. These guidelines are consistent with the Principles and Guidelines for Reporting Preclinical Research issued by the NIH in 2014. Please follow the journal's authorship guidelines in preparing your manuscript.

#### A- Figures

##### 1. Data

The data shown in figures should satisfy the following conditions:

- the data were obtained and processed according to the field's best practice and are presented to reflect the results of the experiments in an accurate and unbiased manner.
- figure panels include only data points, measurements or observations that can be compared to each other in a scientifically meaningful way.
- graphs include clearly labeled error bars for independent experiments and sample sizes. Unless justified, error bars should not be shown for technical replicates.
- if  $n < 5$ , the individual data points from each experiment should be plotted and any statistical test employed should be justified
- Source Data should be included to report the data underlying graphs. Please follow the guidelines set out in the author ship guidelines on Data Presentation.

##### 2. Captions

Each figure caption should contain the following information, for each panel where they are relevant:

- a specification of the experimental system investigated (eg cell line, species name).
- the assay(s) and method(s) used to carry out the reported observations and measurements
- an explicit mention of the biological and chemical entity(ies) that are being measured.
- an explicit mention of the biological and chemical entity(ies) that are altered/varied/perturbed in a controlled manner.
- the exact sample size (n) for each experimental group/condition, given as a number, not a range;
- a description of the sample collection allowing the reader to understand whether the samples represent technical or biological replicates (including how many animals, litters, cultures, etc.).
- a statement of how many times the experiment shown was independently replicated in the laboratory.
- definitions of statistical methods and measures:
  - common tests, such as t-test (please specify whether paired vs. unpaired), simple  $\chi^2$  tests, Wilcoxon and Mann-Whitney tests, can be unambiguously identified by name only, but more complex techniques should be described in the methods section;
  - are tests one-sided or two-sided?
  - are there adjustments for multiple comparisons?
  - exact statistical test results, e.g.,  $P$  values =  $x$  but not  $P$  values  $< x$ ;
  - definition of 'center values' as median or average;
  - definition of error bars as s.d. or s.e.m.

Any descriptions too long for the figure legend should be included in the methods section and/or with the source data.

In the pink boxes below, please ensure that the answers to the following questions are reported in the manuscript itself. Every question should be answered. If the question is not relevant to your research, please write NA (non applicable). We encourage you to include a specific subsection in the methods section for statistics, reagents, animal models and human subjects.

#### B- Statistics and general methods

Please fill out these boxes ↓ (Do not worry if you cannot see all your text once you press return)

|                                                                                                                                                                                         |                                                                                                                                                                                                                                                                                                     |
|-----------------------------------------------------------------------------------------------------------------------------------------------------------------------------------------|-----------------------------------------------------------------------------------------------------------------------------------------------------------------------------------------------------------------------------------------------------------------------------------------------------|
| 1.a. How was the sample size chosen to ensure adequate power to detect a pre-specified effect size?                                                                                     | The sample size is estimated using Power Calculator "G*Power 3.1" on Mac.<br>Test Family: T-Tests; Two-tailed alpha = .05<br>Statistical test: Means: Difference between two independent means.<br>Type of power analysis: A priori: compute required sample size - give a, power, and effect size. |
| 1.b. For animal studies, include a statement about sample size estimate even if no statistical methods were used.                                                                       | The sample size is estimated using Power Calculator "G*Power 3.1" on Mac.<br>Test Family: T-Tests; Two-tailed alpha = .05<br>Statistical test: Means: Difference between two independent means.<br>Type of power analysis: A priori: compute required sample size - give a, power, and effect size. |
| 2. Describe inclusion/exclusion criteria if samples or animals were excluded from the analysis. Were the criteria pre-established?                                                      | NA                                                                                                                                                                                                                                                                                                  |
| 3. Were any steps taken to minimize the effects of subjective bias when allocating animals/samples to treatment (e.g. randomization procedure)? If yes, please describe.                | Yes. The mice were grouped blindly by animal facility staff and infected by M.tb using an inhalation exposure system in the same bucket before drug treatment.                                                                                                                                      |
| For animal studies, include a statement about randomization even if no randomization was used.                                                                                          | Mice were randomly grouped for the EVs in vivo efficacy test (Fig. 7).                                                                                                                                                                                                                              |
| 4.a. Were any steps taken to minimize the effects of subjective bias during group allocation or/and when assessing results (e.g. blinding of the investigator)? If yes please describe. | Yes. For quantitative analysis for confocal microscopy images, at least 100 cells per sample were captured in multiple random areas of slides.                                                                                                                                                      |
| 4.b. For animal studies, include a statement about blinding even if no blinding was done                                                                                                | Histopathological analysis for H&E stained lung sections in Fig.7 was performed blindly by Alexandra Tatarian.                                                                                                                                                                                      |
| 5. For every figure, are statistical tests justified as appropriate?                                                                                                                    | Yes.                                                                                                                                                                                                                                                                                                |
| Do the data meet the assumptions of the tests (e.g., normal distribution)? Describe any methods used to assess it.                                                                      | Yes. Student T-test (two tailed).                                                                                                                                                                                                                                                                   |
| Is there an estimate of variation within each group of data?                                                                                                                            | Yes. Done by "G*Power 3.1" on Mac.                                                                                                                                                                                                                                                                  |

#### USEFUL LINKS FOR COMPLETING THIS FORM

<http://www.antibodypedia.com>  
<http://1degreebio.org>  
<http://www.equator-network.org/reporting-guidelines/improving-bioscience-research-repo>

<http://grants.nih.gov/grants/olaw/olaw.htm>  
<http://www.mrc.ac.uk/Ourresearch/Ethicsresearchguidance/Useofanimals/index.htm>  
<http://ClinicalTrials.gov>  
<http://www.consort-statement.org>  
<http://www.consort-statement.org/checklists/view/32-consort/66-title>

<http://www.equator-network.org/reporting-guidelines/reporting-recommendations-for-tun>  
<http://datadryad.org>

<http://figshare.com>

<http://www.ncbi.nlm.nih.gov/gap>

<http://www.ebi.ac.uk/ega>

<http://biomodels.net/>

<http://biomodels.net/miriam/>  
<http://fiji.biochem.sun.ac.za>  
[http://oba.od.nih.gov/biosecurity/biosecurity\\_documents.html](http://oba.od.nih.gov/biosecurity/biosecurity_documents.html)  
<http://www.selectagents.gov/>

|                                                                                   |      |
|-----------------------------------------------------------------------------------|------|
| Is the variance similar between the groups that are being statistically compared? | Yes. |
|-----------------------------------------------------------------------------------|------|

### C- Reagents

|                                                                                                                                                                                                                                                                                                                              |                                                                               |
|------------------------------------------------------------------------------------------------------------------------------------------------------------------------------------------------------------------------------------------------------------------------------------------------------------------------------|-------------------------------------------------------------------------------|
| 6. To show that antibodies were profiled for use in the system under study (assay and species), provide a citation, catalog number and/or clone number, supplementary information or reference to an antibody validation profile. e.g., Antibodypedia (see link list at top right), 1DegreeBio (see link list at top right). | Included in the Experimental Procedures section.                              |
| 7. Identify the source of cell lines and report if they were recently authenticated (e.g., by STR profiling) and tested for mycoplasma contamination.                                                                                                                                                                        | Cell lines and primary cells are tested annually for mycoplasma contamination |

\* for all hyperlinks, please see the table at the top right of the document

### D- Animal Models

|                                                                                                                                                                                                                                                                                                                                                                                    |                                                                       |
|------------------------------------------------------------------------------------------------------------------------------------------------------------------------------------------------------------------------------------------------------------------------------------------------------------------------------------------------------------------------------------|-----------------------------------------------------------------------|
| 8. Report species, strain, gender, age of animals and genetic modification status where applicable. Please detail housing and husbandry conditions and the source of animals.                                                                                                                                                                                                      | Included in the Experimental Procedures section and in figure legends |
| 9. For experiments involving live vertebrates, include a statement of compliance with ethical regulations and identify the committee(s) approving the experiments.                                                                                                                                                                                                                 | Included in the Experimental Procedures section                       |
| 10. We recommend consulting the ARRIVE guidelines (see link list at top right) (PLoS Biol. 8(6), e1000412, 2010) to ensure that other relevant aspects of animal studies are adequately reported. See author guidelines, under 'Reporting Guidelines'. See also: NIH (see link list at top right) and MRC (see link list at top right) recommendations. Please confirm compliance. | compliance indicated.                                                 |

### E- Human Subjects

|                                                                                                                                                                                                                                                                                                                    |    |
|--------------------------------------------------------------------------------------------------------------------------------------------------------------------------------------------------------------------------------------------------------------------------------------------------------------------|----|
| 11. Identify the committee(s) approving the study protocol.                                                                                                                                                                                                                                                        | NA |
| 12. Include a statement confirming that informed consent was obtained from all subjects and that the experiments conformed to the principles set out in the WMA Declaration of Helsinki and the Department of Health and Human Services Belmont Report.                                                            | NA |
| 13. For publication of patient photos, include a statement confirming that consent to publish was obtained.                                                                                                                                                                                                        | NA |
| 14. Report any restrictions on the availability (and/or on the use) of human data or samples.                                                                                                                                                                                                                      | NA |
| 15. Report the clinical trial registration number (at ClinicalTrials.gov or equivalent), where applicable.                                                                                                                                                                                                         | NA |
| 16. For phase II and III randomized controlled trials, please refer to the CONSORT flow diagram (see link list at top right) and submit the CONSORT checklist (see link list at top right) with your submission. See author guidelines, under 'Reporting Guidelines'. Please confirm you have submitted this list. | NA |
| 17. For tumor marker prognostic studies, we recommend that you follow the REMARK reporting guidelines (see link list at top right). See author guidelines, under 'Reporting Guidelines'. Please confirm you have followed these guidelines.                                                                        | NA |

### F- Data Accessibility

|                                                                                                                                                                                                                                                                                                                                                                                                                                                                                                                                                                                                                                                                                                  |    |
|--------------------------------------------------------------------------------------------------------------------------------------------------------------------------------------------------------------------------------------------------------------------------------------------------------------------------------------------------------------------------------------------------------------------------------------------------------------------------------------------------------------------------------------------------------------------------------------------------------------------------------------------------------------------------------------------------|----|
| 18: Provide a "Data Availability" section at the end of the Materials & Methods, listing the accession codes for data generated in this study and deposited in a public database (e.g. RNA-Seq data: Gene Expression Omnibus GSE39462, Proteomics data: PRIDE PXD000208 etc.) Please refer to our author guidelines for 'Data Deposition'.<br><br>Data deposition in a public repository is mandatory for:<br>a. Protein, DNA and RNA sequences<br>b. Macromolecular structures<br>c. Crystallographic data for small molecules<br>d. Functional genomics data<br>e. Proteomics and molecular interactions                                                                                       | NA |
| 19. Deposition is strongly recommended for any datasets that are central and integral to the study; please consider the journal's data policy. If no structured public repository exists for a given data type, we encourage the provision of datasets in the manuscript as a Supplementary Document (see author guidelines under 'Expanded View' or in unstructured repositories such as Dryad (see link list at top right) or Figshare (see link list at top right).                                                                                                                                                                                                                           | NA |
| 20. Access to human clinical and genomic datasets should be provided with as few restrictions as possible while respecting ethical obligations to the patients and relevant medical and legal issues. If practically possible and compatible with the individual consent agreement used in the study, such data should be deposited in one of the major public access-controlled repositories such as dbGAP (see link list at top right) or EGA (see link list at top right).                                                                                                                                                                                                                    | NA |
| 21. Computational models that are central and integral to a study should be shared without restrictions and provided in a machine-readable form. The relevant accession numbers or links should be provided. When possible, standardized format (SBML, CellML) should be used instead of scripts (e.g. MATLAB). Authors are strongly encouraged to follow the MIRIAM guidelines (see link list at top right) and deposit their model in a public database such as Biomedels (see link list at top right) or JWS Online (see link list at top right). If computer source code is provided with the paper, it should be deposited in a public repository or included in supplementary information. | NA |

### G- Dual use research of concern

|                                                                                                                                                                                                                                                                                               |    |
|-----------------------------------------------------------------------------------------------------------------------------------------------------------------------------------------------------------------------------------------------------------------------------------------------|----|
| 22. Could your study fall under dual use research restrictions? Please check biosecurity documents (see link list at top right) and list of select agents and toxins (APHIS/CDC) (see link list at top right). According to our biosecurity guidelines, provide a statement only if it could. | NA |
|-----------------------------------------------------------------------------------------------------------------------------------------------------------------------------------------------------------------------------------------------------------------------------------------------|----|
